# Supplementary material for: Reversible structural rearrangement of π-expanded cyclooctatetraene upon two-fold reduction with alkali metals
Source: Royal Society of Chemistry journal article supplement (doi:10.1039/d2cc00218c), 2022-01-01
Supplement: d2cc00218c1.pdf [file d2cc00218c1.pdf]

## Supporting Information

|              |                                                        |           |
|--------------|--------------------------------------------------------|-----------|
| <b>I.</b>    | <b>Materials and Methods</b> .....                     | <b>1</b>  |
| <b>II.</b>   | <b>UV-Vis Spectroscopic Investigation</b> .....        | <b>3</b>  |
| <b>III.</b>  | <b>NMR Spectroscopic Investigation</b> .....           | <b>5</b>  |
| <b>IV.</b>   | <b>Study of Redox Reversibility</b> .....              | <b>13</b> |
| <b>V.</b>    | <b>Crystal Structure Solution and Refinement</b> ..... | <b>17</b> |
| <b>VI.</b>   | <b>Quantum-Chemical Calculations</b> .....             | <b>27</b> |
| <b>VII.</b>  | <b>Comment on Crystallographic Data Quality</b> .....  | <b>31</b> |
| <b>VIII.</b> | <b>References</b> .....                                | <b>34</b> |

## I. Materials and Methods

All manipulations were carried out using break-and-seal and glove-box techniques under an atmosphere of argon.<sup>[1]</sup> Tetrahydrofuran (THF) and hexanes (Sigma Aldrich) were dried over Na/benzophenone and distilled prior to use. Tetrahydrofuran-*d*<sub>8</sub> (≥99.5 atom %D, Sigma Aldrich) was dried over NaK<sub>2</sub> alloy and vacuum-transferred. Lithium (99 %), sodium (99.9 %), 18-crown-6 ether (99 %), and [2.2.2]cryptand (98 %) were purchased from Sigma Aldrich and used as received. C<sub>72</sub>H<sub>48</sub> (**1**) was prepared and purified according to the previously reported procedure.<sup>[2]</sup> The UV-Vis spectra were recorded on a Thermo Scientific Evolution 201 UV-Visible Spectrophotometer. The <sup>1</sup>H, <sup>7</sup>Li, <sup>13</sup>C and <sup>1</sup>H-<sup>1</sup>H COSY NMR spectra were recorded on a Bruker Ascend-500 spectrometer (500 MHz for <sup>1</sup>H, 194 MHz for <sup>7</sup>Li, and 126 MHz for <sup>13</sup>C). Chemical shifts (δ) are reported in parts per million (ppm) and referenced to the resonances of the corresponding solvent used. The low-temperature NMR experiment was controlled by a Cryo Diffusion cryogenic tank probe, and liquid N<sub>2</sub> was used as a cooling source. Mass spectra were acquired using a DART-SVP ion source (IonSense, Saugus, MA, USA) coupled to a JEOL AccuTOF time-of-flight mass spectrometer (JEOL USA, Peabody, MA, USA); settings: DART positive mode, 5–20 V (orifice voltage), 500 °C (heater temperature). The presence of the interstitial THF molecules coupled with extreme air- and moisture sensitivity of the crystals prevented obtaining elemental analysis data.

### **[{Li<sup>+</sup>([2.2.2]cryptand)<sub>2</sub>(1<sub>TR</sub><sup>2-</sup>)]·2THF (2·2THF)**

THF (1.5 mL) was added to a customized glass system containing excess Li (5.0 mg, 0.710 mmol), **1** (1.5 mg, 0.002 mmol), and [2.2.2]cryptand (3.0 mg, 0.008 mmol). The mixture was allowed to stir under argon at 25 °C for 30 minutes in a closed system. The initial off-white color of the suspension (neutral ligand) has changed to pale blue after 15 minutes, deepened to dark purple after 20 minutes and remained the same color until the reaction was stopped. The suspension was filtered, and the purple filtrate was layered with 1.2 mL of hexanes. The ampule was sealed and stored at 5 °C. After 5 days, some black plates were present in moderate yield. Yield: 1.2 mg, 40%. UV-Vis (THF, λ<sub>max</sub>, nm): 486, 572. <sup>1</sup>H NMR (THF-*d*<sub>8</sub>, 25 °C, δ, ppm): 2.48–3.48 (36H, [2.2.2]cryptand), 4.93–4.94 (2H, **1**<sub>TR</sub><sup>2-</sup>), 5.91–5.99 (4H, **1**<sub>TR</sub><sup>2-</sup>), 6.16–6.26 (12H, **1**<sub>TR</sub><sup>2-</sup>), 6.35–6.45 (10H, **1**<sub>TR</sub><sup>2-</sup>), 6.68–6.70 (4H, **1**<sub>TR</sub><sup>2-</sup>), 6.93–7.00 (8H, **1**<sub>TR</sub><sup>2-</sup>), 7.05–7.08 (2H, **1**<sub>TR</sub><sup>2-</sup>), 7.11–7.13 (2H, **1**<sub>TR</sub><sup>2-</sup>), 7.21–7.22 (2H, **1**<sub>TR</sub><sup>2-</sup>), 8.06–8.08 (2H, **1**<sub>TR</sub><sup>2-</sup>).

**[{Na<sup>+</sup>(18-crown-6)(THF)<sub>2</sub>}<sub>2</sub>(1<sub>TR</sub><sup>2-</sup>)]·3THF (3·3THF)**

THF (1.5 mL) was added to a customized glass system containing excess Na (2.0 mg, 0.087 mmol), **1** (2.0 mg, 0.002 mmol), and 18-crown-6 ether (1.5 mg, 0.006 mmol). The mixture was allowed to stir under argon at 25 °C for 30 minutes in a closed system. The initial off-white color of the suspension (neutral ligand) has changed to pale blue after 10 minutes, deepened to dark purple after 15 minutes and remained the same until the reaction was stopped. The suspension was filtered, and the purple filtrate was layered with 1.2 mL of hexanes. The ampule was sealed and stored at 5 °C. Dark plate-shaped crystals were present in good yield after 10 days. Yield: 3.1 mg, 80%. UV-Vis (THF,  $\lambda_{\text{max}}$ , nm): 479, 580. <sup>1</sup>H NMR (THF-*d*<sub>8</sub>, 25 °C,  $\delta$ , ppm): 3.51 (48H, 18-crown-6), 4.92–4.93 (2H, **1**<sub>TR</sub><sup>2-</sup>), 5.89–5.95 (4H, **1**<sub>TR</sub><sup>2-</sup>), 6.15–6.25 (12H, **1**<sub>TR</sub><sup>2-</sup>), 6.35–6.44 (10H, **1**<sub>TR</sub><sup>2-</sup>), 6.68–6.70 (4H, **1**<sub>TR</sub><sup>2-</sup>), 6.90–7.06 (10H, **1**<sub>TR</sub><sup>2-</sup>), 7.10–7.12 (2H, **1**<sub>TR</sub><sup>2-</sup>), 7.19–7.20 (2H, **1**<sub>TR</sub><sup>2-</sup>), 8.03–8.05 (2H, **1**<sub>TR</sub><sup>2-</sup>).

## II. UV-Vis Spectroscopic Investigation

**Sample preparation:** THF (2.0 mL) was added to an airtight storage ampule containing Na metal (0.50 mg, 0.022 mmol), [2.2.2]cryptand (0.20 mg,  $7.6 \times 10^{-4}$  mmol), and **1** (0.30 mg,  $3.3 \times 10^{-4}$  mmol); and UV-Vis spectra were monitored at different reaction times (total 20 hours) at room temperature.

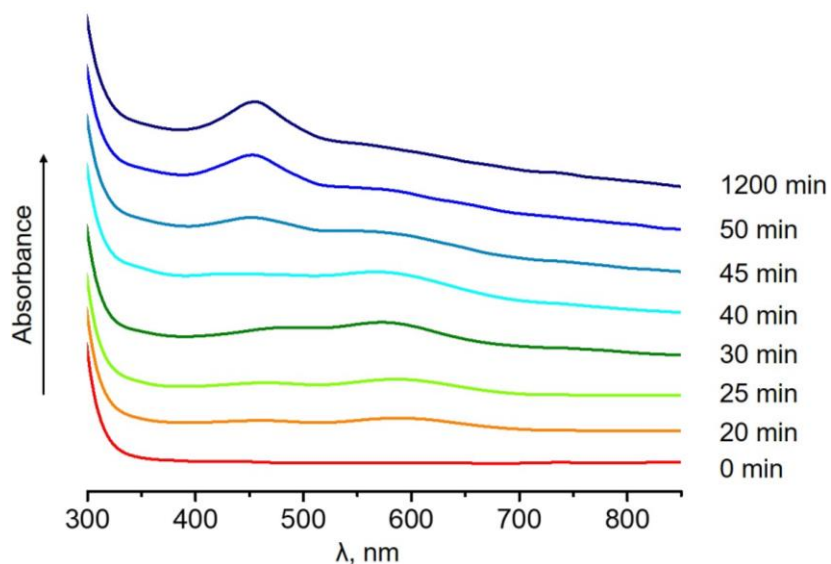

**Fig. S1** UV-Vis spectra of Li/[2.2.2]cryptand/**1** in THF.

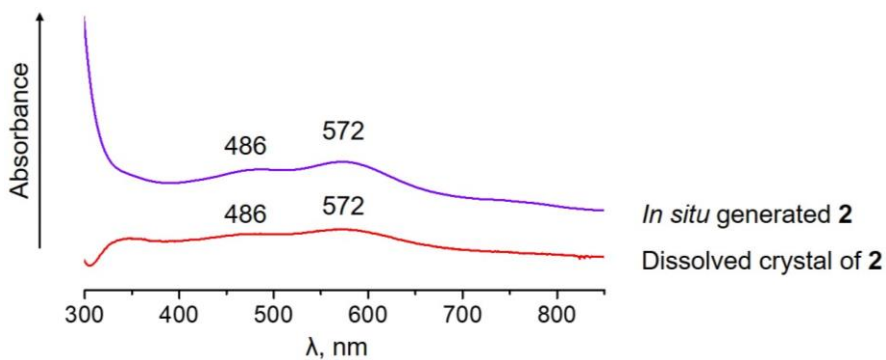

**Fig. S2** UV-Vis spectra of *in situ* generated **2** and crystals of **2** dissolved in THF.

**Sample preparation:** THF (2.0 mL) was added to an airtight storage ampule containing Na metal (0.50 mg, 0.022 mmol), 18-crown-6 (0.20 mg,  $7.6 \times 10^{-4}$  mmol), and **1** (0.30 mg,  $3.3 \times 10^{-4}$  mmol); and UV-Vis spectra were monitored at different reaction times (total 24 hours) at room temperature.

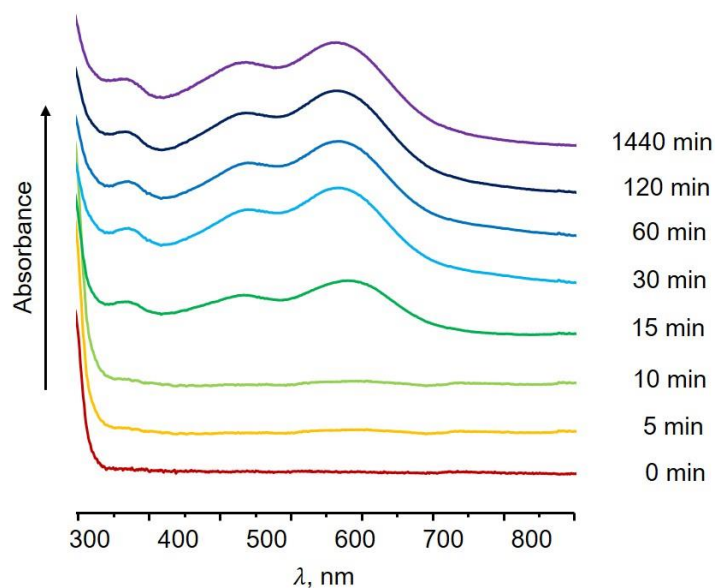

**Fig. S3** UV-Vis spectra of Na/18-crown-6/**1** in THF.

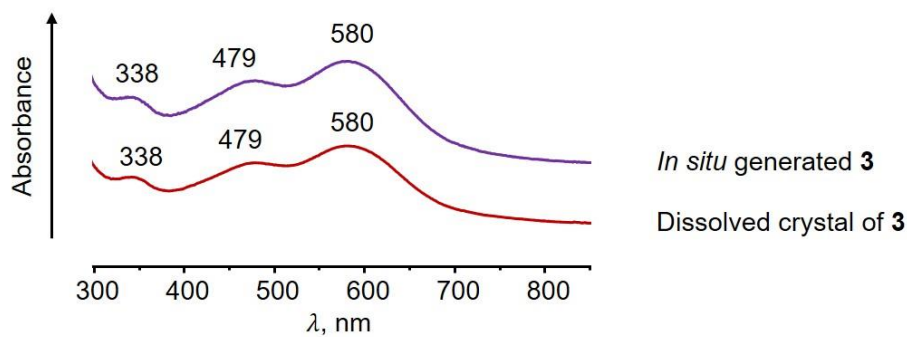

**Fig. S4** UV-Vis spectra of *in situ* generated **3** and crystals of **3** dissolved in THF.

### III. NMR Spectroscopic Investigation

**Sample preparation:** Crystals of **2** or **3** (3.0 mg) were washed several times with hexanes, dried *in-vacuo*, and dissolved in THF-*d*<sub>8</sub> (0.70 mL). The resulting solution was transferred to an NMR tube that was sealed under argon.

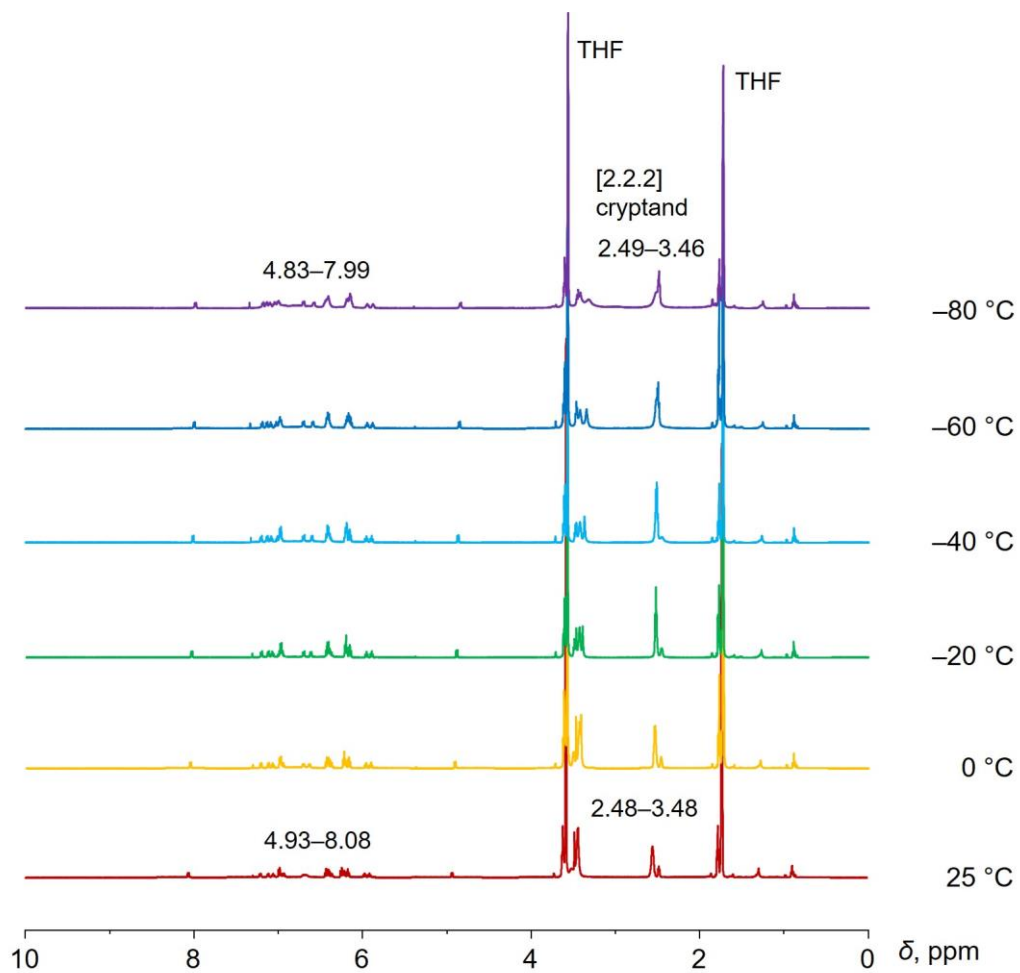

**Fig. S5** Variable-temperature <sup>1</sup>H NMR spectra of **2** in THF-*d*<sub>8</sub>.

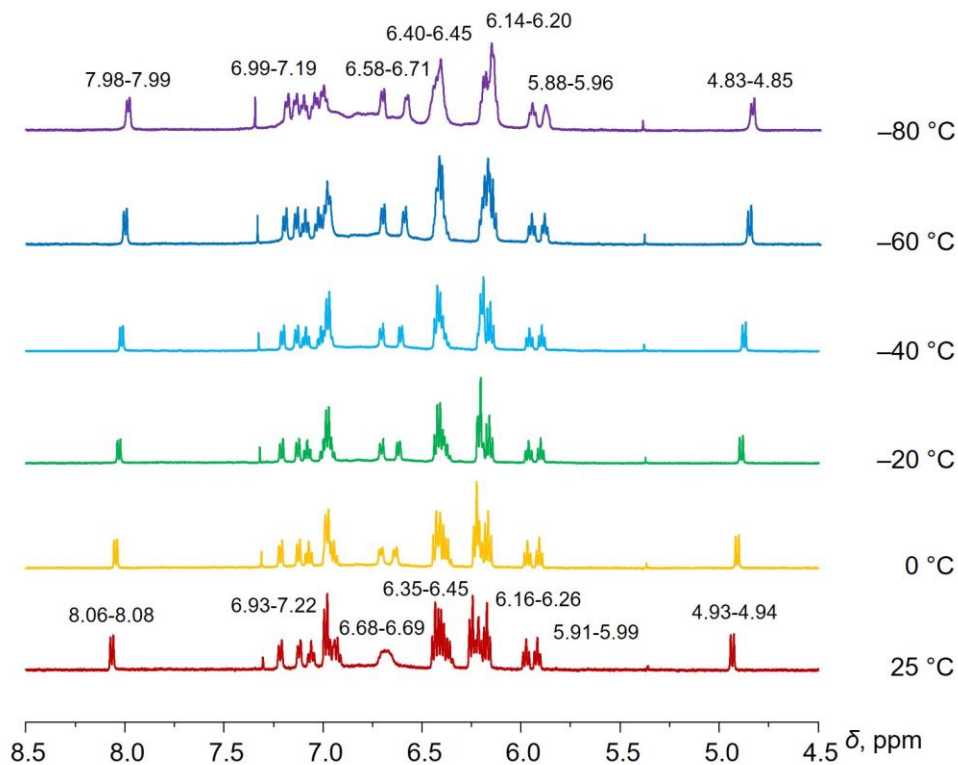

**Fig. S6** Variable-temperature  $^1\text{H}$  NMR spectra of **2** in  $\text{THF-}d_8$  with chemical shifts at 25 °C and –80 °C, aromatic region.

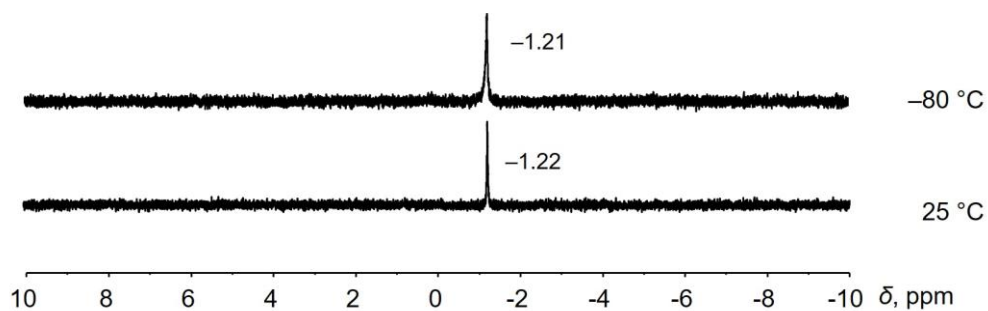

**Fig. S7**  $^7\text{Li}$  NMR spectra of **2** in  $\text{THF-}d_8$  at 25 °C and –80 °C.

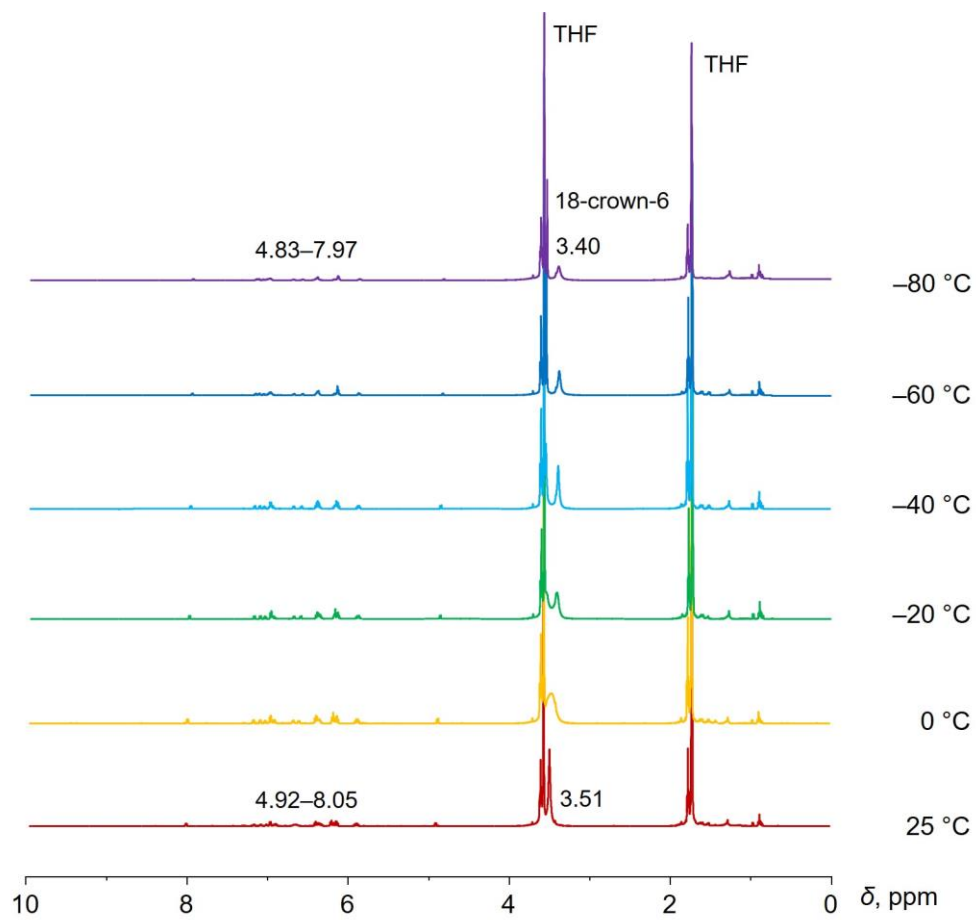

**Fig. S8** Variable-temperature  $^1\text{H}$  NMR spectra of **3** in  $\text{THF-}d_8$ .



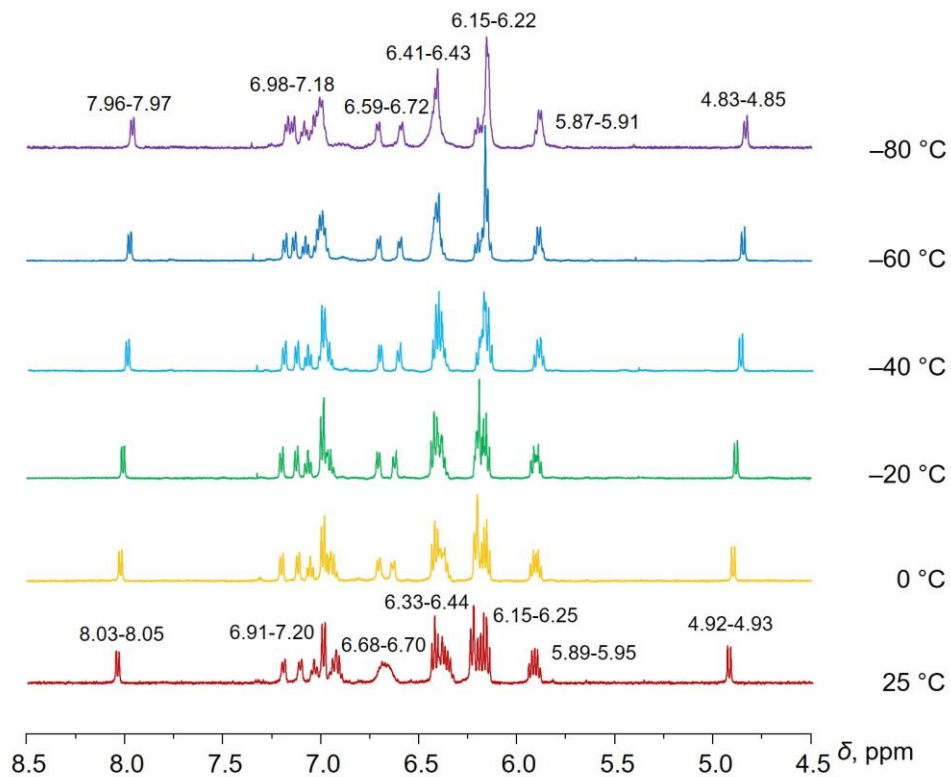

**Fig. S9** Variable-temperature <sup>1</sup>H NMR spectra of **3** in THF-*d*<sub>8</sub> with chemical shifts at 25 °C and –80 °C, aromatic region.

**Sample preparation:** THF- $d_8$  (0.60 mL) was added to an NMR tube containing excess Li metal (2.0 mg, 0.290 mmol), [2.2.2]cryptand (4.0 mg, 0.011 mmol), and **1** (2.0 mg, 0.002 mmol). The NMR tube was sealed under argon. The initial color of the mixture was colorless. The mixture was allowed to sit for 30 min to afford a deep purple solution. The Li metal was decanted from the mixture, and the NMR spectra were collected.

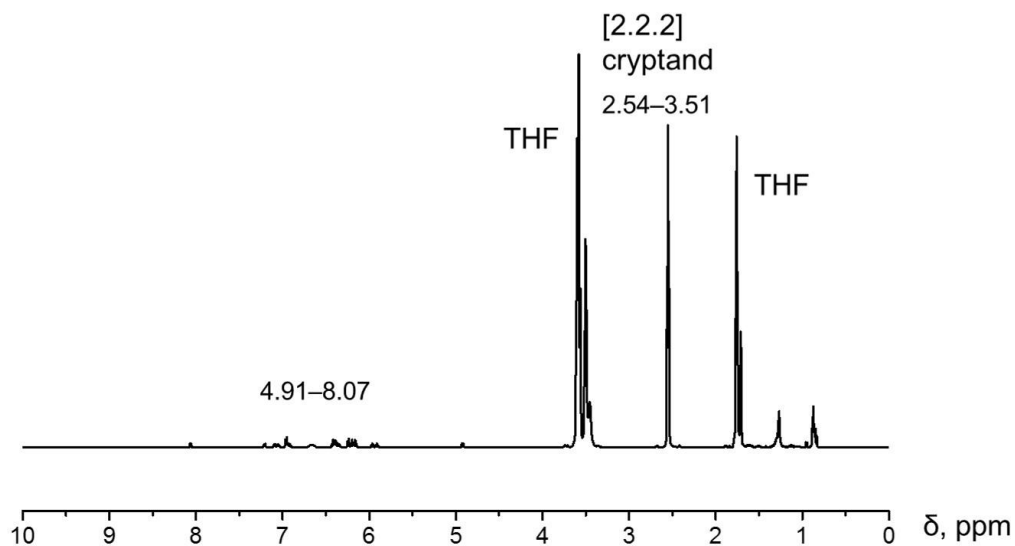

**Fig. S10**  $^1\text{H}$  NMR spectrum of *in situ* generated **2** in THF- $d_8$  at 25 °C.

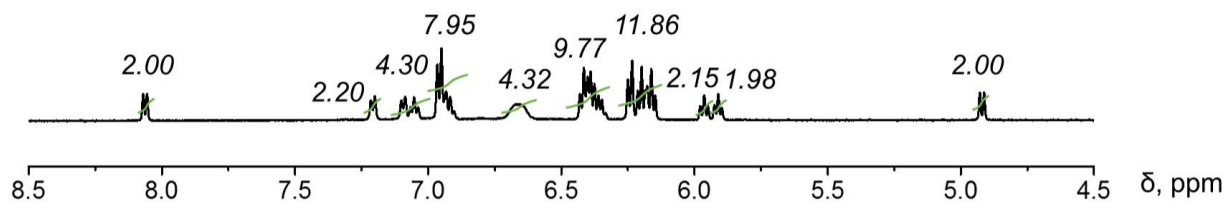

**Fig. S11**  $^1\text{H}$  NMR spectrum of *in situ* generated **2** in THF- $d_8$  at 25 °C with integrations, aromatic region.

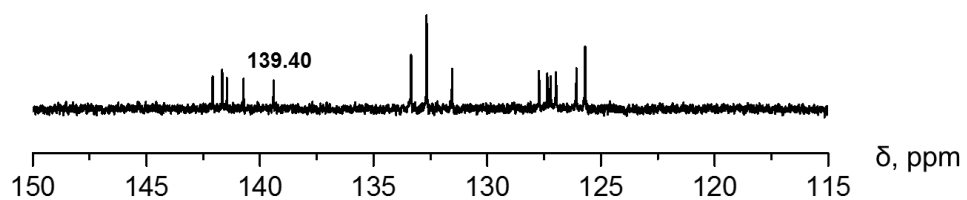

**Fig. S12** <sup>13</sup>C NMR spectrum of **1** in THF-*d*<sub>8</sub> at 25 °C, aromatic region.

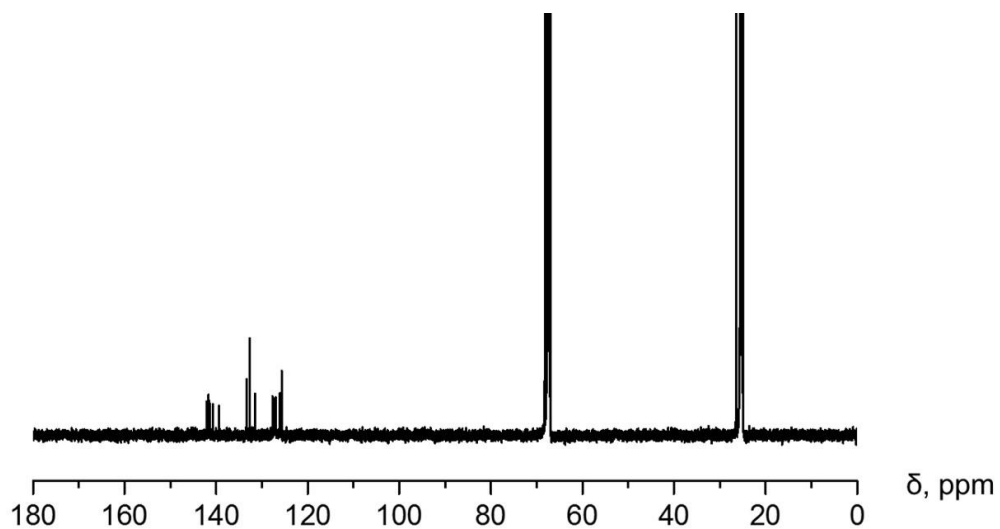

**Fig. S13** <sup>13</sup>C NMR spectrum of **1** in THF-*d*<sub>8</sub> at 25 °C.

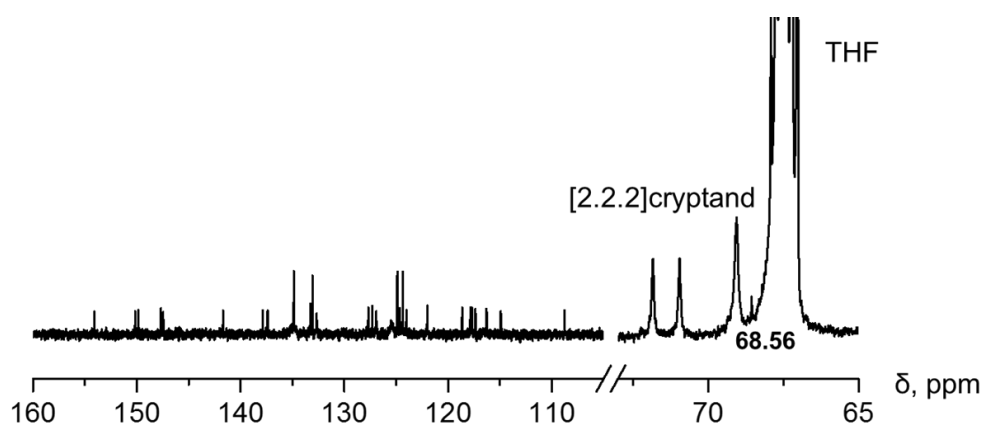

**Fig. S14** <sup>13</sup>C NMR spectrum of *in situ* generated **2** in THF-*d*<sub>8</sub> at 25 °C, selected region.

**Sample preparation:** THF- $d_8$  (0.60 mL) was added to an NMR tube containing excess Na metal (2.0 mg, 0.087 mmol), 18-crown-6 (2.0 mg, 0.008 mmol), and **1** (3.0 mg, 0.003 mmol). The NMR tube was sealed under argon. The initial color of the mixture was colorless. The mixture was allowed to sit for 24 hours to afford a deep purple solution. The Na metal was decanted from the mixture and the NMR spectra were collected.

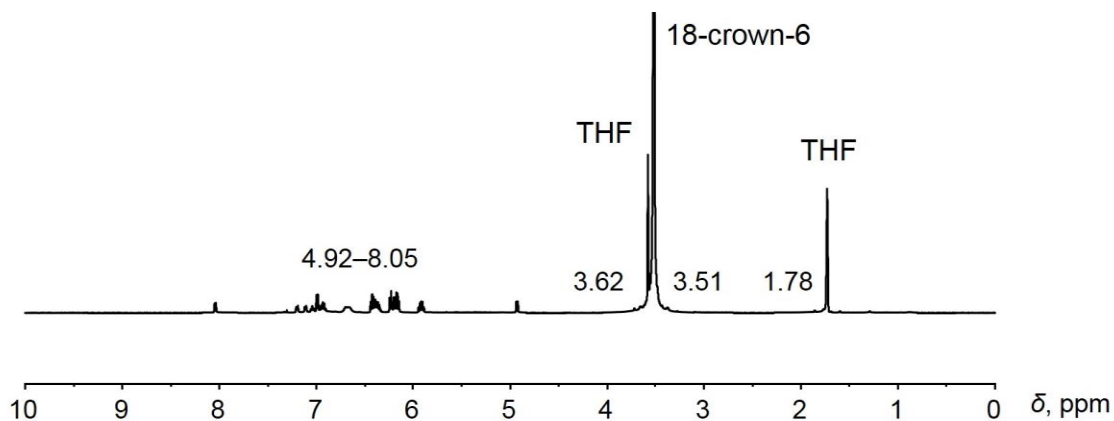

**Fig. S15**  $^1\text{H}$  NMR spectrum of *in situ* generated **3** in THF- $d_8$  at 25 °C.

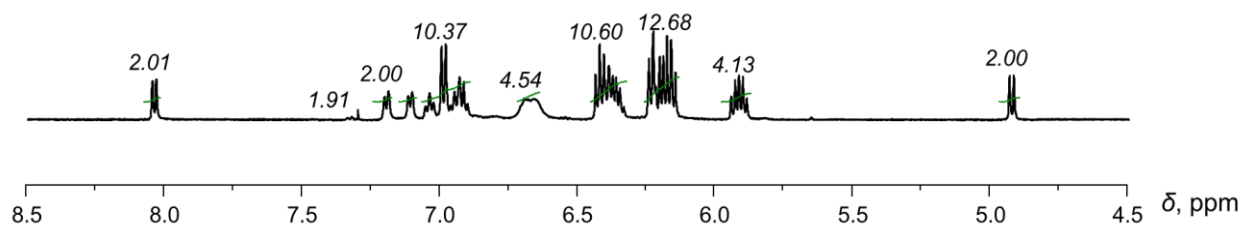

**Fig. S16**  $^1\text{H}$  NMR spectrum of *in situ* generated **3** in THF- $d_8$  at 25 °C with integrations, aromatic region.

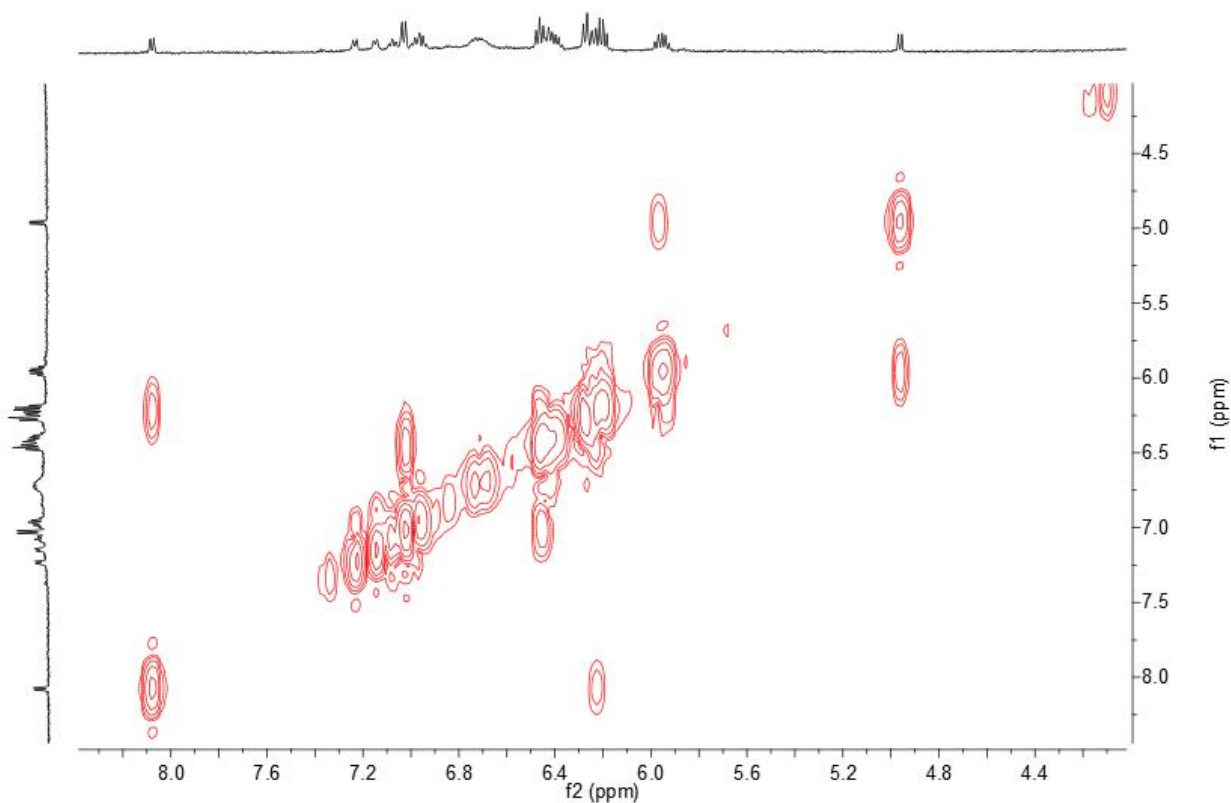

**Fig. S17** <sup>1</sup>H-<sup>1</sup>H COSY spectrum of *in situ* generated **3** in THF-*d*<sub>8</sub> at 25 °C, aromatic region.

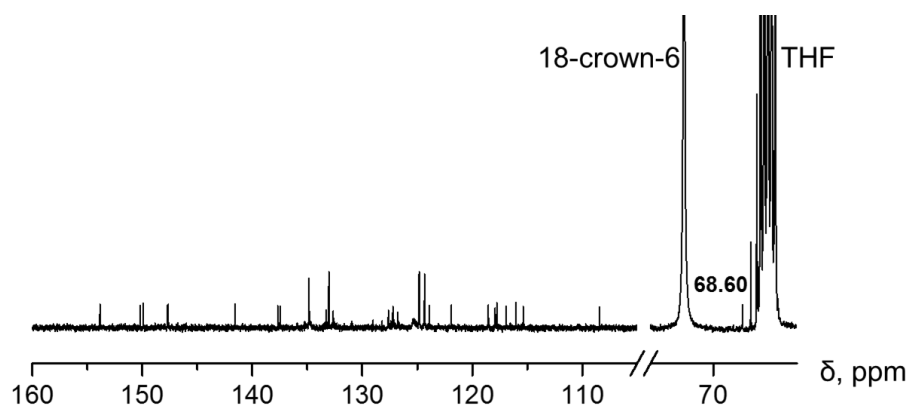

**Fig. S18** <sup>13</sup>C NMR spectrum of *in situ* generated **3** in THF-*d*<sub>8</sub> at 25 °C, selected region.

#### IV. Study of Redox Reversibility

**Sample preparation for NMR study:** THF- $d_8$  (0.60 mL) was added to an NMR tube containing **1** (4.0 mg, 0.004 mmol), Li (2.0 mg, 0.286 mmol), and [2.2.2]cryptand (3.0 mg, 0.008 mmol). The tube was sealed under argon. The  $^1\text{H}$  and  $^{13}\text{C}$  NMR spectra of **1** were collected immediately, and that of *in situ* generated **2** were collected after 30 minutes. The solution was then exposed to air by opening the tube. The resulting off-white solution was checked as the spectra of a quenched product.

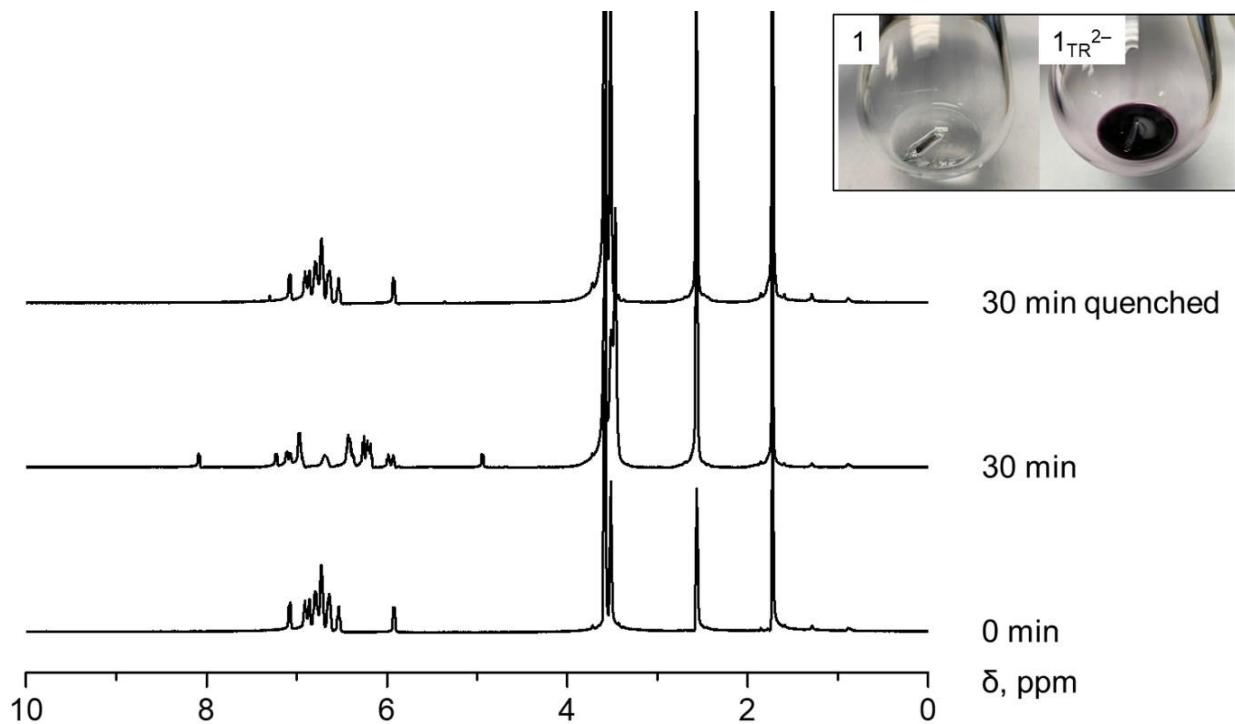

**Fig. S19**  $^1\text{H}$  NMR spectra of **1**, *in situ* generated  $1_{\text{TR}}^{2-}$  with Li and [2.2.2]cryptand, and its quenched product, 25 °C in THF- $d_8$ .

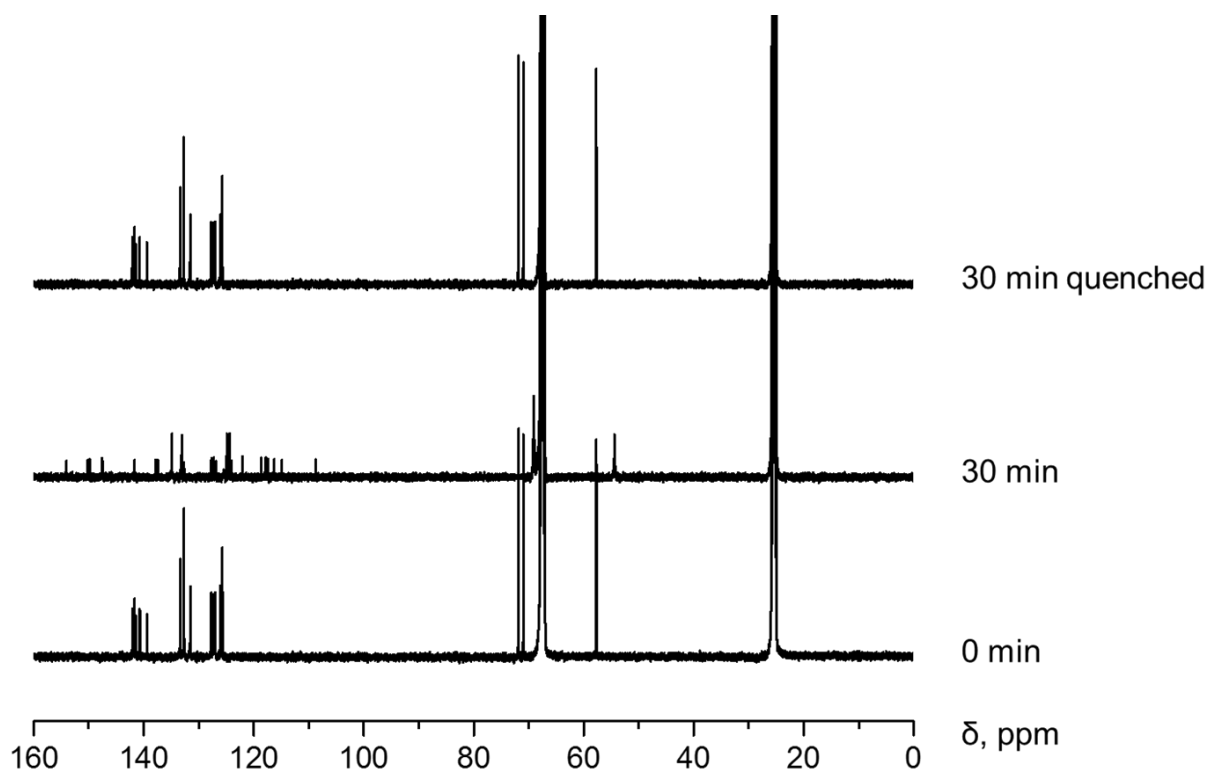

**Fig. S20**  $^{13}\text{C}$  NMR spectra of **1**, *in situ* generated  $\mathbf{1}_{\text{TR}}^{2-}$  with Li and [2.2.2]cryptand, and its quenched product, 25 °C in THF- $d_8$ .

**Sample preparation for NMR study:** THF- $d_8$  (0.80 mL) was added to an NMR tube containing **1** (4.0 mg, 0.004 mmol), Na (2.3 mg, 0.100 mmol), and 18-crown-6 ether (2.3 mg, 0.009 mmol). The tube was sealed under argon. The  $^1\text{H}$  and  $^{13}\text{C}$  NMR spectra of **1** were collected immediately, and that of *in situ* generated **3** were collected after 20 minutes. The solution was then exposed to air by opening the tube. The resulting off-white solution was checked as the spectra of a quenched product.

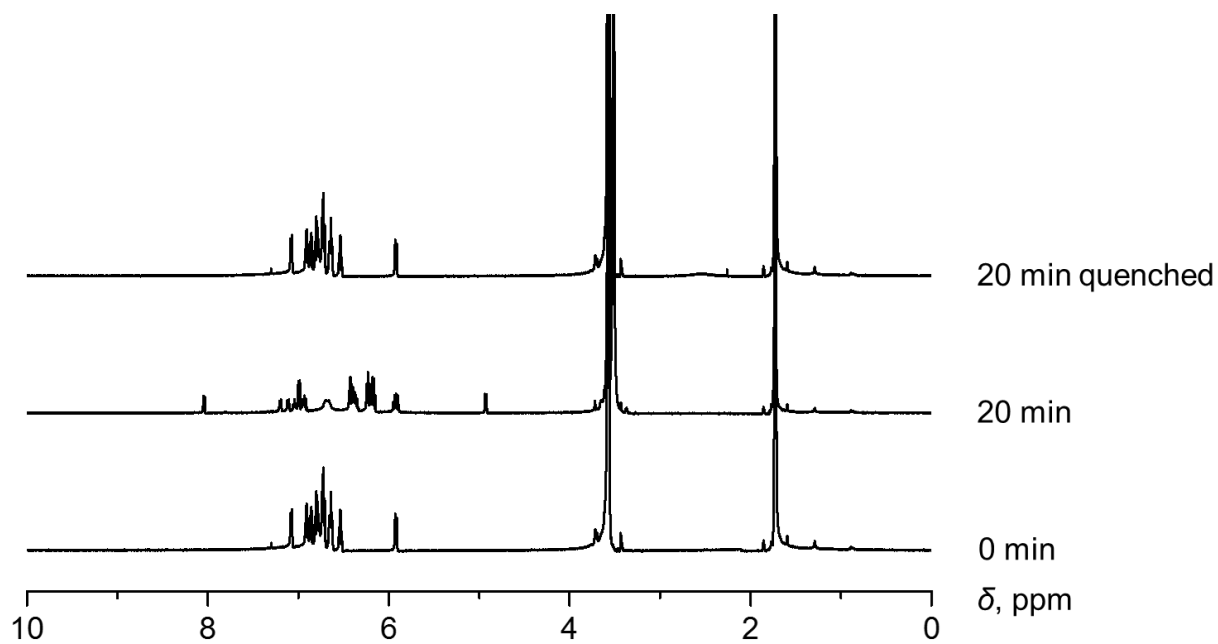

**Fig. S21**  $^1\text{H}$  NMR spectra of **1**, *in situ* generated  $\mathbf{1}_{\text{TR}}^{2-}$  with Na and 18-crown-6 ether, and its quenched product, 25 °C in THF- $d_8$ .

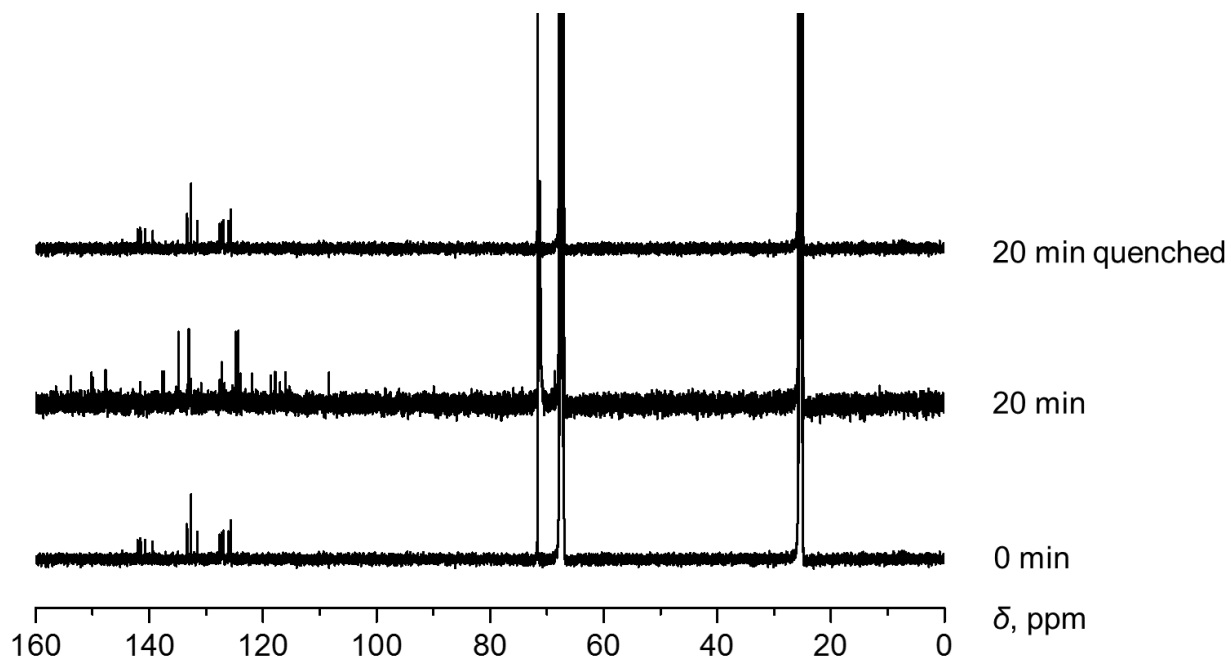

**Fig. S22**  $^{13}\text{C}$  NMR spectra of **1**, *in situ* generated  $\mathbf{1}_{\text{TR}}^{2-}$  with Na and 18-crown-6 ether, and its quenched product; 25 °C in THF- $d_8$ .



**Sample preparation for DART-MS study:** THF (2.0 mL) was added to a glass tube containing **1** (2.0 mg, 0.002 mmol), Na (2.0 mg, 0.087 mmol), and 18-crown-6 (1.2 mg, 0.005 mmol). The tube was sealed under argon. After 48 hours, the solution was exposed to air by opening the tube, and the spectrum was recorded as quenched product of  $\mathbf{1}_{\text{TR}}^{2-}$ .

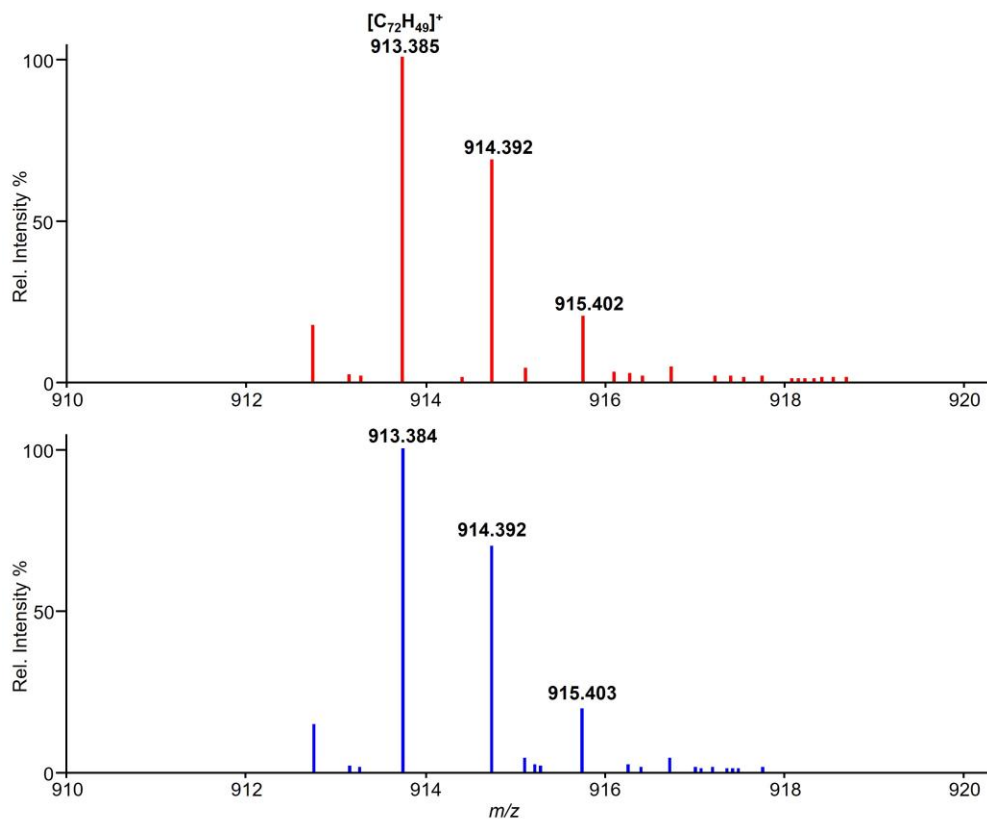

**Fig. S23** DART spectra of **1** (bottom) and the quenched product of  $\mathbf{1}_{\text{TR}}^{2-}$  (top).

## V. Crystal Structure Solution and Refinement

Data collection of **2**·2THF was performed on a Bruker D8 VENTURE X-ray diffractometer with a PHOTON 100 CMOS detector equipped with a Cu-target, Incoatec microfocus source  $I\mu$ S X-ray tube ( $\lambda = 1.54178 \text{ \AA}$ ) at  $T = 100(2) \text{ K}$ . Data collection of **3**·3THF was performed on the same diffractometer with a Mo-target X-ray tube ( $\lambda = 0.71073 \text{ \AA}$ ) at  $T = 100(2) \text{ K}$ . Data reduction and integration were performed with the Bruker software package SAINT. (version 8.38A).<sup>[3]</sup> Data were corrected for absorption effects using the empirical methods as implemented in SADABS (version 2016/2).<sup>[4]</sup> The structures were solved by SHELXT (version 2018/2)<sup>[5]</sup> and refined by full-matrix least-squares procedures using the Bruker SHELXTL (version 2018/3)<sup>[6]</sup> software package through the OLEX2 graphical interface.<sup>[7]</sup> All non-hydrogen atoms (including those in disorder parts) were refined anisotropically. The H-atoms were also included at calculated positions and refined as riders, with  $U_{\text{iso}}(\text{H}) = 1.2 U_{\text{eq}}(\text{C})$ . In **2**·2THF, both  $[\text{Li}([\text{2.2.2}]\text{cryptand})]^+$  cations were found to be disordered and were modeled with two orientations. In **3**·3THF, all four 18-crown-6 molecules, seven THF molecules, and three phenyl rings of the ligands were found to be disordered and were modeled with two orientations. The geometries of the disordered parts were restrained to be similar. The anisotropic displacement parameters in the direction of the bonds were restrained to be equal with a standard uncertainty of  $0.004 \text{ \AA}^2$ . They were also restrained to have the same  $U_{ij}$  components, with a standard uncertainty of  $0.01 \text{ \AA}^2$ . In each unit cell of **2**·2THF, eight THF solvent molecules were found to be severely disordered and removed by the Olex2's solvent mask subroutine.<sup>[7]</sup> The total void volume was  $1124.0 \text{ \AA}^3$ , equivalent to 11.6 % of the unit cell's total volume. In each unit cell of **3**·3THF, twelve THF solvent molecules were found to be severely disordered and removed by the SQUEEZE routine in PLATON (version 100419).<sup>[8]</sup> The total void volume was  $2163.6 \text{ \AA}^3$  indicated by PLATON, equivalent to 19.3 % of the unit cell's total volume. Further crystal and data collection details are listed in Table S1 and Section VII.

**Table S1.** Crystallographic data of **2** and **3**

| Compound                                    | 2·2THF                                                                           | 3·3THF                                                            |
|---------------------------------------------|----------------------------------------------------------------------------------|-------------------------------------------------------------------|
| Chemical formula                            | C <sub>116</sub> H <sub>136</sub> Li <sub>2</sub> O <sub>14</sub> N <sub>4</sub> | C <sub>124</sub> H <sub>152</sub> Na <sub>2</sub> O <sub>19</sub> |
| $M_r$                                       | 1824.16                                                                          | 1992.43                                                           |
| Temperature (K)                             | 100(2)                                                                           | 100(2)                                                            |
| Wavelength (Å)                              | 1.54178                                                                          | 0.71073                                                           |
| Crystal system                              | Monoclinic                                                                       | Monoclinic                                                        |
| Space group                                 | $P2_1/c$                                                                         | $P2_1$                                                            |
| $a$ (Å)                                     | 31.5584(14)                                                                      | 13.197(3)                                                         |
| $b$ (Å)                                     | 12.5876(6)                                                                       | 57.995(11)                                                        |
| $c$ (Å)                                     | 25.8302(11)                                                                      | 15.630(3)                                                         |
| $\alpha$ (°)                                | 90.00                                                                            | 90.00                                                             |
| $\beta$ (°)                                 | 109.384(3)                                                                       | 110.696(2)                                                        |
| $\gamma$ (°)                                | 90.00                                                                            | 90.00                                                             |
| $V$ (Å <sup>3</sup> )                       | 9679.3(8)                                                                        | 11191(4)                                                          |
| $Z$                                         | 4                                                                                | 4                                                                 |
| $F(000)$                                    | 3912                                                                             | 4280                                                              |
| $\mu$ (mm <sup>-1</sup> )                   | 0.640                                                                            | 0.085                                                             |
| $\rho_{calcd}$ (g·cm <sup>-3</sup> )        | 1.252                                                                            | 1.054                                                             |
| Crystal size (mm)                           | 0.02×0.16×0.22                                                                   | 0.03×0.13×0.20                                                    |
| Transmission factors (min/max)              | 0.5890/0.7528                                                                    | 0.6119/0.7028                                                     |
| Reflections collected                       | 59724                                                                            | 151540                                                            |
| Independent reflections                     | 16870                                                                            | 41044                                                             |
| $R_{int}$                                   | 0.2994                                                                           | 0.1396                                                            |
| $\theta$ range (°) for data collection      | 2.97–66.99                                                                       | 2.72–25.42                                                        |
| $R1[F^2 > 2\sigma(F^2)]$ , $wR2(F^2)$ , $S$ | 0.1525, 0.3945, 1.029                                                            | 0.0764, 0.1802, 0.995                                             |
| No. of reflections                          | 16870                                                                            | 41044                                                             |
| No. of parameters                           | 1623                                                                             | 3466                                                              |
| No. of restraints                           | 4125                                                                             | 7996                                                              |

<sup>a</sup> $R1 = \sum||F_o| - |F_c|| / \sum|F_o|$ . <sup>b</sup> $wR2 = [\sum[w(F_o^2 - F_c^2)^2] / \sum[w(F_o^2)^2]]$ .

<sup>c</sup>Quality-of-fit =  $[\sum[w(F_o^2 - F_c^2)^2] / (N_{obs} - N_{params})]^{1/2}$ , based on all data.

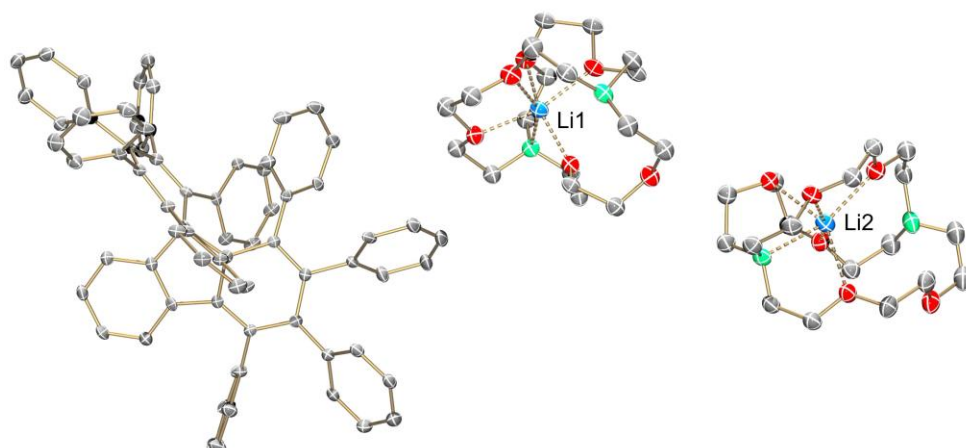

**Fig. S24** ORTEP drawing of the asymmetric unit of **2** at the 40% level. H-atoms are omitted for clarity. The color scheme used: C grey, O red, N spring green, Li slate blue.

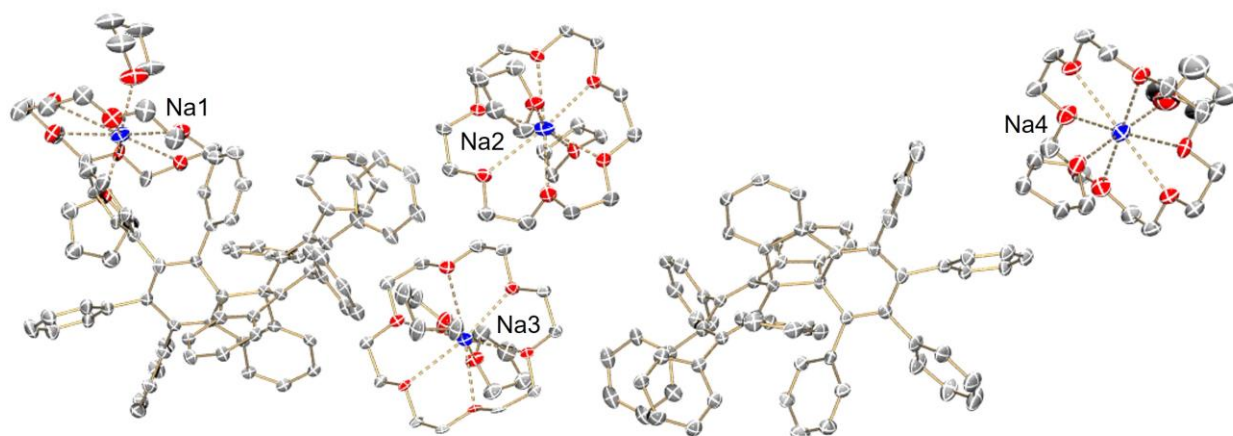

**Fig. S25** ORTEP drawing of the asymmetric unit of **3** at the 40% level. H-atoms are omitted for clarity. The color scheme used: Na blue, O red, and C grey.

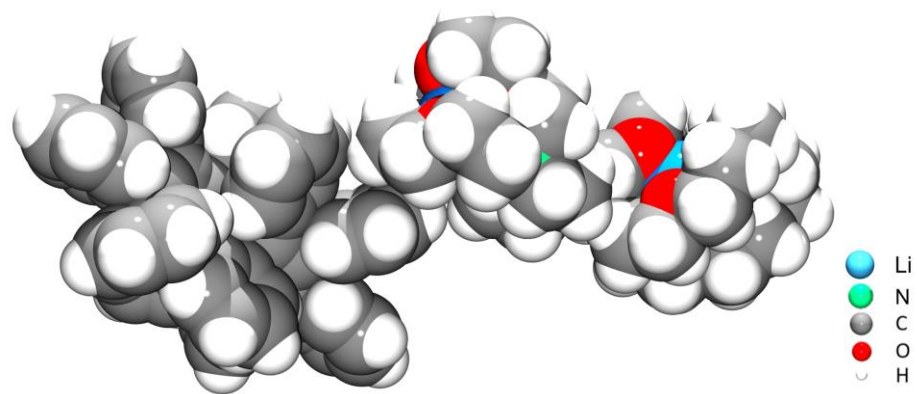

**Fig. S26** Crystal structure of **2**, space-filling model.

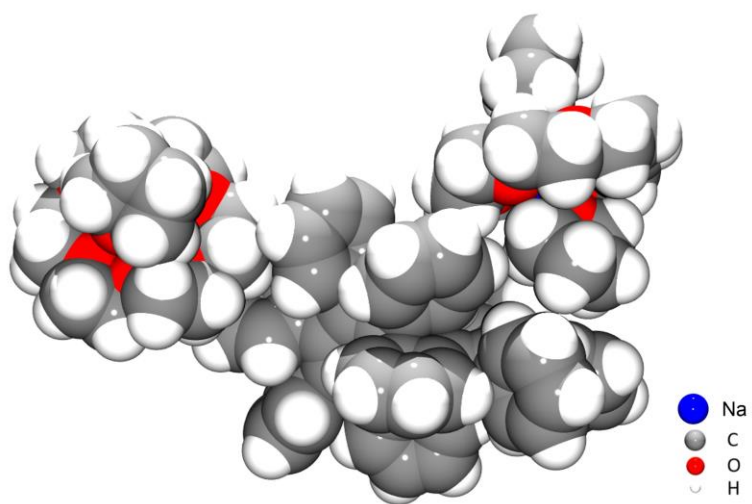

**Fig. S27** Crystal structure of **3**, space-filling model.

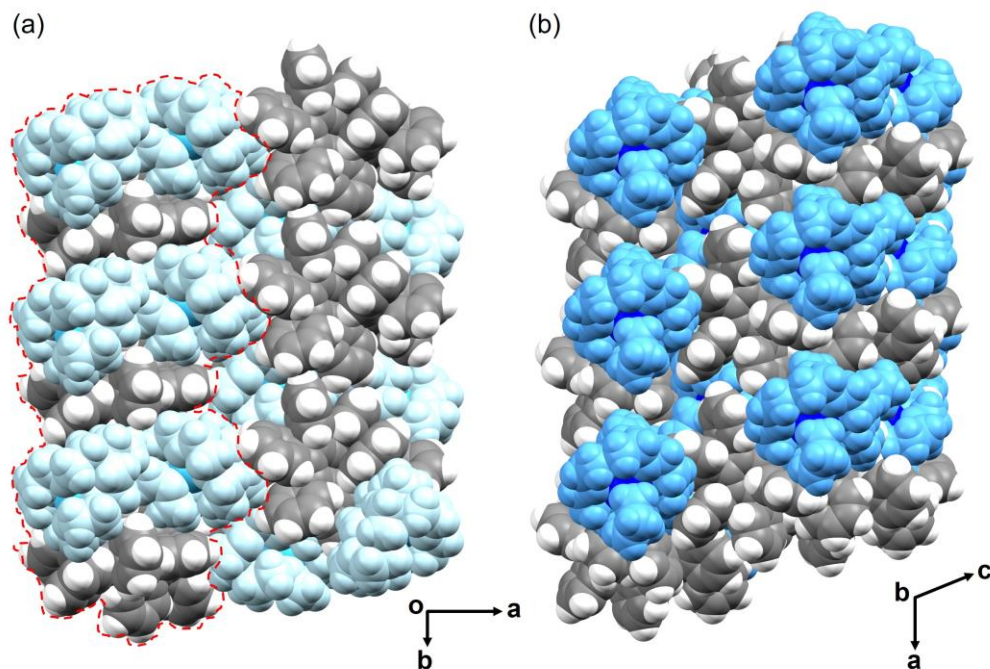

**Fig. S28** Solid state packing in (a) **2** (a 1D column is highlighted) and (b) **3**, space-filling models.  $\{\text{Li}^+([\text{2.2.2}]\text{cryptand})\}$  and  $\{\text{Na}^+(\text{18-crown-6})(\text{THF})_2\}$  moieties are shown in different shades of blue.

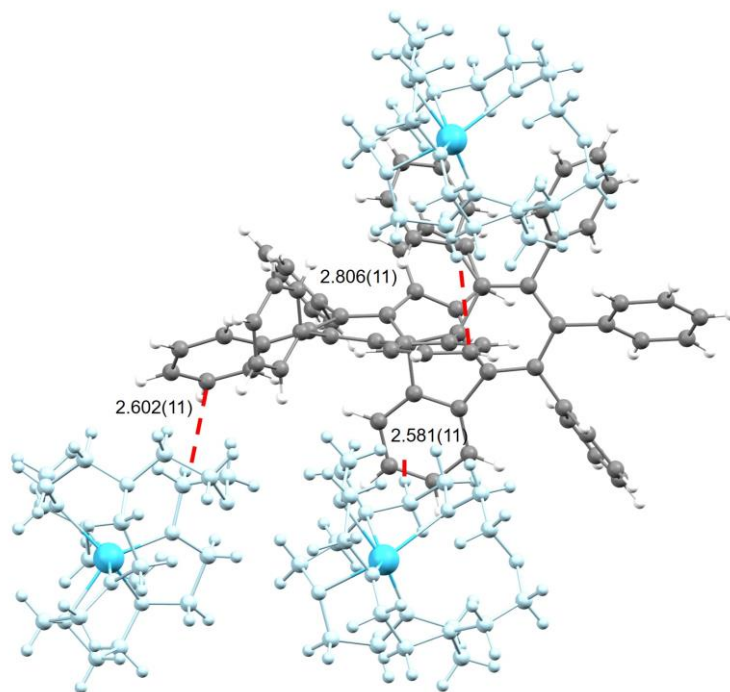

**Fig. S29** C–H $\cdots\pi$  interactions in **2**, ball-and-stick model.

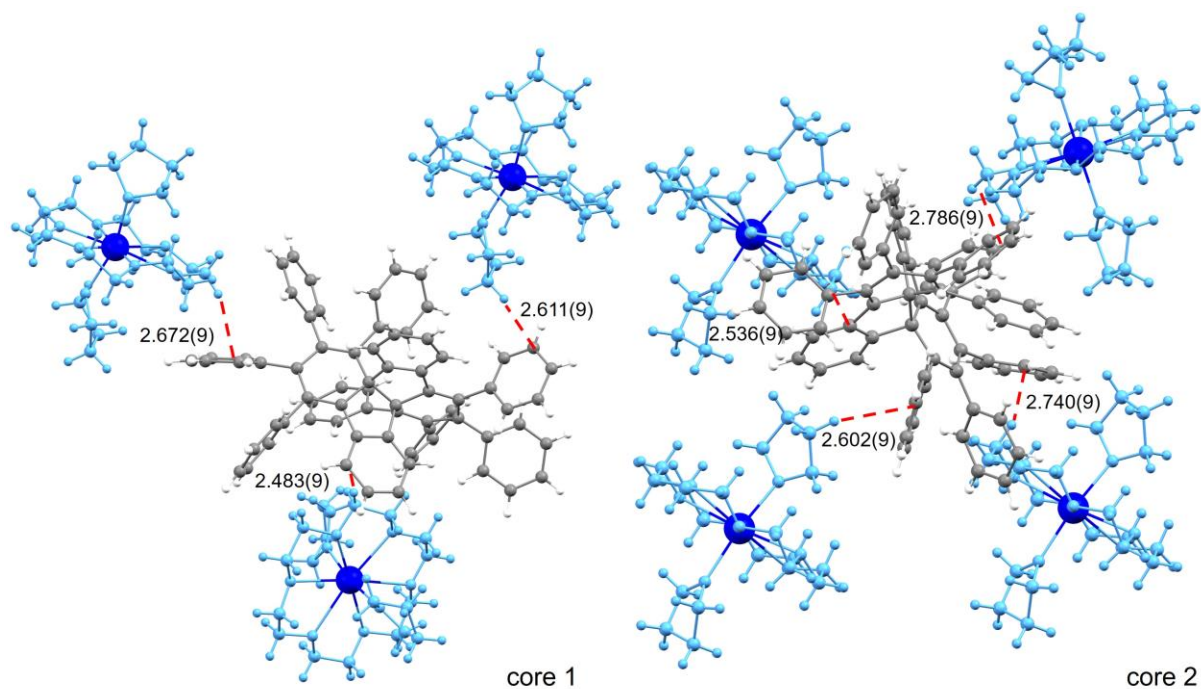

**Fig. S30** C–H··· $\pi$  interactions in **3**, ball-and-stick model.

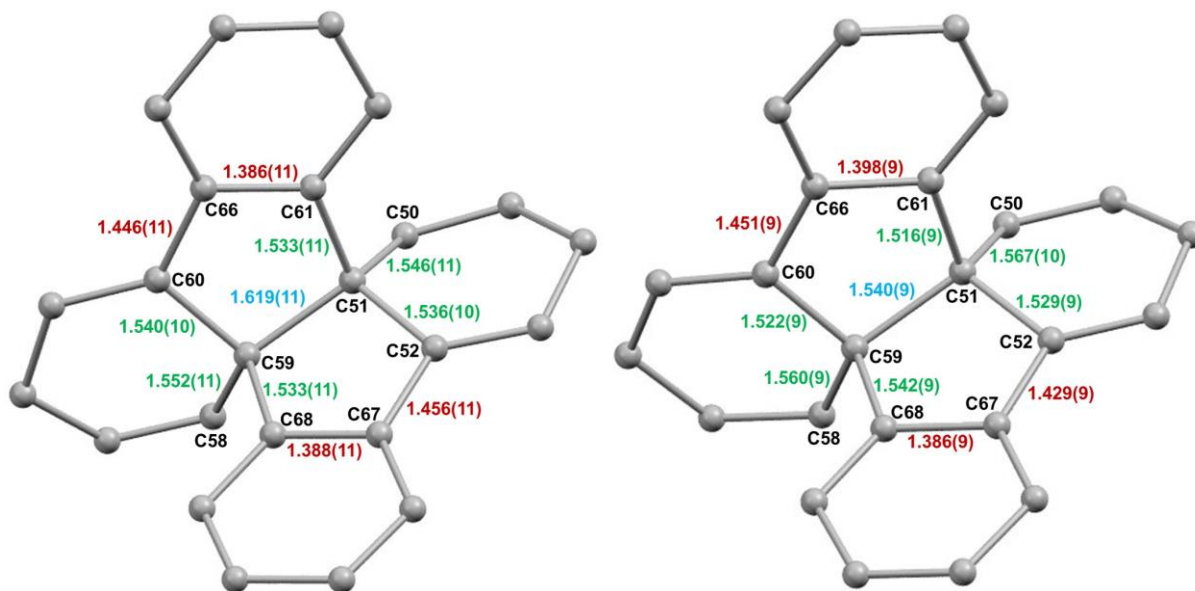

**Fig. S31** Comparison of the  $1\text{TR}^{2-}$  anions in **2** and **3**, along with the selected C–C bond distances (Å), ball-and-stick models without H-atoms. The new C–C bond is shown in blue. The elongated bonds are shown in green, whereas the shortened bonds are shown in red.

**Table S2.** Distances from weighted least-squares planes of selected rings (Å) in  $1_{TR}^{2-}$  core in **2** and **3**, along with a labeling scheme

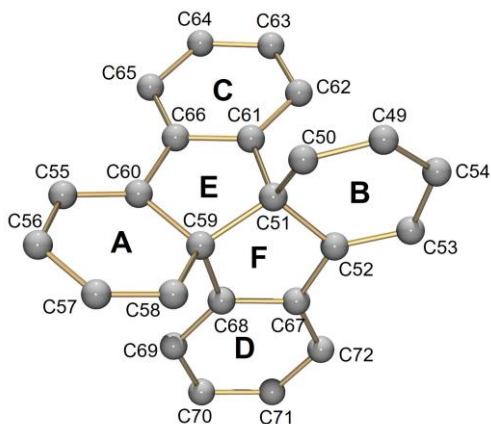

|                                       | Position | Distance |                                      | Position | Distance |
|---------------------------------------|----------|----------|--------------------------------------|----------|----------|
| Ring A                                | C55      | 0.005    | Ring B                               | C51      | -0.226   |
|                                       | C56      | 0.011    |                                      | C52      | 0.127    |
|                                       | C57      | 0.009    |                                      | C53      | 0.058    |
|                                       | C58      | -0.039   |                                      | C54      | -0.137   |
|                                       | C59      | 0.050    |                                      | C49      | 0.016    |
|                                       | C60      | -0.036   |                                      | C50      | 0.162    |
| 0.171x+0.968y+0.182z+27.640=0 (0.030) |          |          | 0.929x+0.067y-0.364z+3.487=0 (0.139) |          |          |
| Ring C                                | C61      | -0.019   | Ring D                               | C67      | 0.007    |
|                                       | C62      | 0.006    |                                      | C68      | -0.005   |
|                                       | C63      | 0.014    |                                      | C69      | 0.001    |
|                                       | C64      | -0.019   |                                      | C70      | 0.001    |
|                                       | C65      | 0.004    |                                      | C71      | 0.002    |
|                                       | C66      | 0.015    |                                      | C72      | -0.006   |
| 0.182x+0.821y+0.541z+29.774=0 (0.014) |          |          | 0.928x-0.117y-0.354z-0.453=0 (0.004) |          |          |
| Ring E                                | C51      | -0.123   | Ring F                               | C51      | -0.145   |
|                                       | C59      | 0.153    |                                      | C52      | 0.104    |
|                                       | C60      | -0.128   |                                      | C59      | 0.132    |
|                                       | C61      | 0.052    |                                      | C67      | -0.015   |
|                                       | C66      | 0.046    |                                      | C68      | -0.076   |
| 0.092x+0.782y+0.617z+29.490=0 (0.109) |          |          | 0.911x-0.220y-0.349z-3.041=0 (0.105) |          |          |



|        | <b>Position</b>                       | <b>Distance</b> |        | <b>Position</b>                        | <b>Distance</b> |
|--------|---------------------------------------|-----------------|--------|----------------------------------------|-----------------|
|        | C55                                   | -0.058          |        | C51                                    | 0.238           |
|        | C56                                   | 0.132           |        | C52                                    | 0.096           |
| Ring A | C57                                   | -0.019          | Ring B | C53                                    | 0.106           |
|        | C58                                   | -0.153          |        | C54                                    | -0.161          |
|        | C59                                   | 0.213           |        | C49                                    | 0.004           |
|        | C60                                   | -0.115          |        | C50                                    | 0.192           |
|        | 0.961x+0.004y-0.278z+12.887=0 (0.131) |                 |        | 0.095x-0.989y-0.114z-10.048=0 (0.153)  |                 |
|        | C61                                   | 0.018           |        | C67                                    | -0.003          |
|        | C62                                   | 0.001           |        | C68                                    | -0.004          |
| Ring C | C63                                   | -0.013          | Ring D | C69                                    | 0.013           |
|        | C64                                   | 0.006           |        | C70                                    | -0.015          |
|        | C65                                   | 0.012           |        | C71                                    | 0.008           |
|        | C66                                   | -0.024          |        | C72                                    | 0.001           |
|        | 0.878x+0.190y-0.440z+10.341=0 (0.015) |                 |        | -0.093x-0.985y-0.146z-13.778=0 (0.009) |                 |
|        | C51                                   | -0.090          |        | C51                                    | -0.116          |
|        | C59                                   | 0.109           |        | C52                                    | 0.084           |
| Ring E | C60                                   | -0.095          | Ring F | C59                                    | 0.111           |
|        | C61                                   | 0.042           |        | C67                                    | -0.006          |
|        | C66                                   | 0.034           |        | C68                                    | -0.073          |
|        | 0.864x+0.274y-0.422z+11.367=0 (0.080) |                 |        | -0.184x-0.966y-0.184z-15.931=0 (0.087) |                 |

**Table S3.** Selected C–C bond distances (Å) in  $\mathbf{1}_{\text{TR}}^{2-}$  in **2** and **3**

| Distance | <b>2</b>  | <b>3</b>  | Distance | <b>2</b>  | <b>3</b>  |
|----------|-----------|-----------|----------|-----------|-----------|
| C1–C2    | 1.406(12) | 1.428(10) | C37–C42  | 1.380(11) | 1.376(10) |
| C1–C6    | 1.388(11) | 1.410(10) | C37–C53  | 1.485(10) | 1.492(10) |
| C1–C49   | 1.484(11) | 1.424(10) | C38–C39  | 1.363(12) | 1.354(10) |
| C2–C3    | 1.390(12) | 1.337(10) | C39–C40  | 1.380(13) | 1.353(11) |
| C3–C4    | 1.371(13) | 1.375(12) | C40–C41  | 1.368(13) | 1.402(11) |
| C4–C5    | 1.378(14) | 1.347(12) | C41–C42  | 1.380(12) | 1.394(11) |
| C5–C6    | 1.384(12) | 1.397(11) | C43–C44  | 1.408(11) | 1.404(10) |
| C7–C8    | 1.394(11) | 1.444(10) | C43–C48  | 1.423(12) | 1.404(10) |
| C7–C12   | 1.390(11) | 1.369(10) | C43–C54  | 1.462(11) | 1.464(10) |
| C7–C50   | 1.457(11) | 1.469(10) | C44–C45  | 1.391(12) | 1.369(11) |
| C8–C9    | 1.391(11) | 1.355(10) | C45–C46  | 1.402(13) | 1.382(12) |
| C9–C10   | 1.388(13) | 1.379(10) | C46–C47  | 1.358(12) | 1.375(12) |
| C10–C11  | 1.392(14) | 1.395(11) | C47–C48  | 1.378(12) | 1.397(11) |
| C11–C12  | 1.407(12) | 1.368(10) | C49–C50  | 1.381(11) | 1.398(10) |
| C13–C14  | 1.385(12) | 1.336(10) | C49–C54  | 1.458(11) | 1.461(10) |
| C13–C18  | 1.385(12) | 1.407(10) | C50–C51  | 1.546(11) | 1.567(10) |
| C13–C55  | 1.500(11) | 1.468(9)  | C51–C52  | 1.536(10) | 1.529(9)  |
| C14–C15  | 1.392(12) | 1.392(10) | C51–C59  | 1.619(11) | 1.540(9)  |
| C15–C16  | 1.343(13) | 1.369(11) | C51–C61  | 1.533(11) | 1.516(9)  |
| C16–C17  | 1.349(14) | 1.375(11) | C52–C53  | 1.351(11) | 1.386(10) |
| C17–C18  | 1.386(12) | 1.386(9)  | C52–C67  | 1.456(11) | 1.429(9)  |
| C19–C20  | 1.387(12) | 1.388(15) | C53–C54  | 1.448(11) | 1.437(10) |
| C19–C24  | 1.386(11) | 1.391(15) | C55–C56  | 1.440(11) | 1.454(9)  |
| C19–C56  | 1.479(11) | 1.491(15) | C55–C60  | 1.384(11) | 1.398(9)  |
| C20–C21  | 1.392(12) | 1.388(14) | C56–C57  | 1.430(11) | 1.427(9)  |
| C21–C22  | 1.359(13) | 1.371(16) | C57–C58  | 1.359(11) | 1.345(9)  |
| C22–C23  | 1.379(14) | 1.359(16) | C58–C59  | 1.552(11) | 1.560(9)  |
| C23–C24  | 1.398(12) | 1.400(15) | C59–C60  | 1.540(10) | 1.522(9)  |
| C25–C26  | 1.397(11) | 1.411(11) | C59–C68  | 1.533(11) | 1.542(9)  |
| C25–C30  | 1.385(11) | 1.387(11) | C60–C66  | 1.446(11) | 1.451(9)  |
| C25–C57  | 1.524(11) | 1.503(10) | C61–C62  | 1.395(11) | 1.405(9)  |
| C26–C27  | 1.372(12) | 1.386(10) | C61–C66  | 1.386(11) | 1.398(9)  |

|         |           |           |         |           |           |
|---------|-----------|-----------|---------|-----------|-----------|
| C27–C28 | 1.375(13) | 1.364(12) | C62–C63 | 1.403(11) | 1.403(9)  |
| C28–C29 | 1.375(13) | 1.357(12) | C63–C64 | 1.377(12) | 1.349(10) |
| C29–C30 | 1.391(12) | 1.416(11) | C64–C65 | 1.380(11) | 1.402(10) |
| C31–C32 | 1.403(10) | 1.408(9)  | C65–C66 | 1.413(11) | 1.417(9)  |
| C31–C36 | 1.379(10) | 1.387(9)  | C67–C68 | 1.388(11) | 1.386(9)  |
| C31–C58 | 1.472(10) | 1.491(9)  | C67–C72 | 1.399(11) | 1.424(9)  |
| C32–C33 | 1.412(11) | 1.376(9)  | C68–C69 | 1.387(11) | 1.386(10) |
| C33–C34 | 1.388(11) | 1.344(10) | C69–C70 | 1.370(11) | 1.403(10) |
| C34–C35 | 1.379(12) | 1.395(10) | C70–C71 | 1.383(12) | 1.361(10) |
| C35–C36 | 1.371(11) | 1.403(9)  | C71–C72 | 1.359(12) | 1.377(10) |
| C37–C38 | 1.389(11) | 1.361(10) |         |           |           |

---

## VI. Quantum-Chemical Calculations

### Computational Details

All calculations were performed using the program package Turbomole (version 7.3),<sup>[9]</sup> and were carried out on the DFT level (within Kohn-Sham theory) applying the B3LYP exchange-correlation functional<sup>[10]</sup> and the def2-TZVP basis set family<sup>[11]</sup> if not stated otherwise (in the following, the prefix def2- will be omitted). Throughout, the multipole accelerated RI method<sup>[12-14]</sup> was used to calculate the Coulomb part of the electronic energy, and Grimme's D3 dispersion correction<sup>[15]</sup> was adopted (w/o damping).

Solvent effects are captured within the conductor-like screening model (COSMO)<sup>[16]</sup> with the dielectric constant  $\epsilon = 7.6$  mimicking THF. In case of neutral molecules, we used the usual COSMO screening factor  $f = \frac{\epsilon-1}{\epsilon+\frac{1}{2}}$ , whereas for charged molecules final energies were evaluated with  $f = \frac{\epsilon-1}{\epsilon}$ , as it has been shown that this is more accurate for ions.<sup>[17]</sup> In any case, energies were corrected for the so-called outlying-charge error as described in Ref. [18]. We use the shorthand notation COSMO-B3LYP/TZVP to denote this level of theory.

After geometry optimization, vibrational harmonic frequencies were obtained by numerical differentiation using the module NumForce from the Turbomole suite. We verified that minimum structures do not exhibit any imaginary frequencies and that transition states possess exactly one imaginary frequency. Finally, thermal corrections to the free enthalpy  $G$  at standard conditions ( $T = 298\text{K}$ ,  $p = 1\text{bar}$ ) are computed using a modified harmonic-oscillator approximation that interpolates the entropic contributions of low-frequency vibrations below  $300\text{ cm}^{-1}$  between a free rotator model and the (usual) harmonic oscillator model, see Ref. [19] for details. This methodology leads to a more balanced description of the entropy contributions from these low-frequency vibrations (within the commonly adopted harmonic approximation the entropy contributions of low-frequency vibrations are notoriously overestimated).

The reaction energy ( $\Delta H^\circ$ ,  $\Delta G^\circ$ ) of the reduction

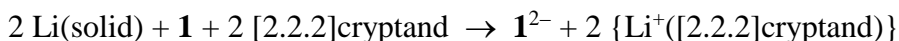

was calculated by partitioning the overall reaction according to

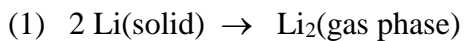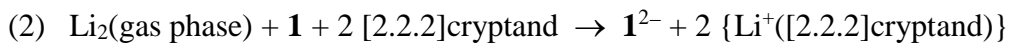

and using the experimental vaporization energies of solid lithium<sup>[20]</sup> for reaction (1):

$$\Delta H^\circ = +51.6 \text{ kcal/mol}, \Delta G^\circ = +41.7 \text{ kcal/mol.}$$

$\text{Li}_2(\text{gas phase})$  was treated as a perfect gas.

### Structures and Charge Distributions:

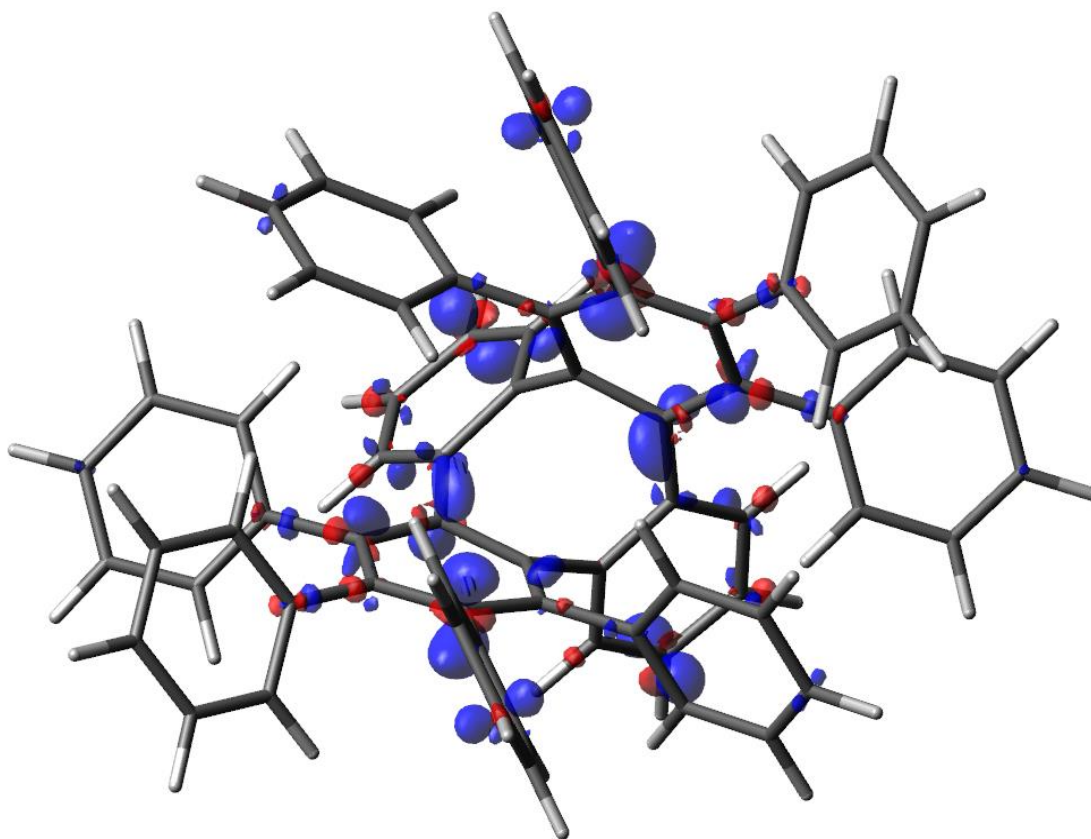

**Fig. S32** Optimized structure and differential charge distribution of  $\mathbf{1}^{2-}$  (with respect to neutral  $\mathbf{1}$  at the same geometry). Blue: Increase of electron density, red: decrease of electron density. Iso-surfaces plotted at  $0.004 \text{ e/Bohr}^{-3}$ .

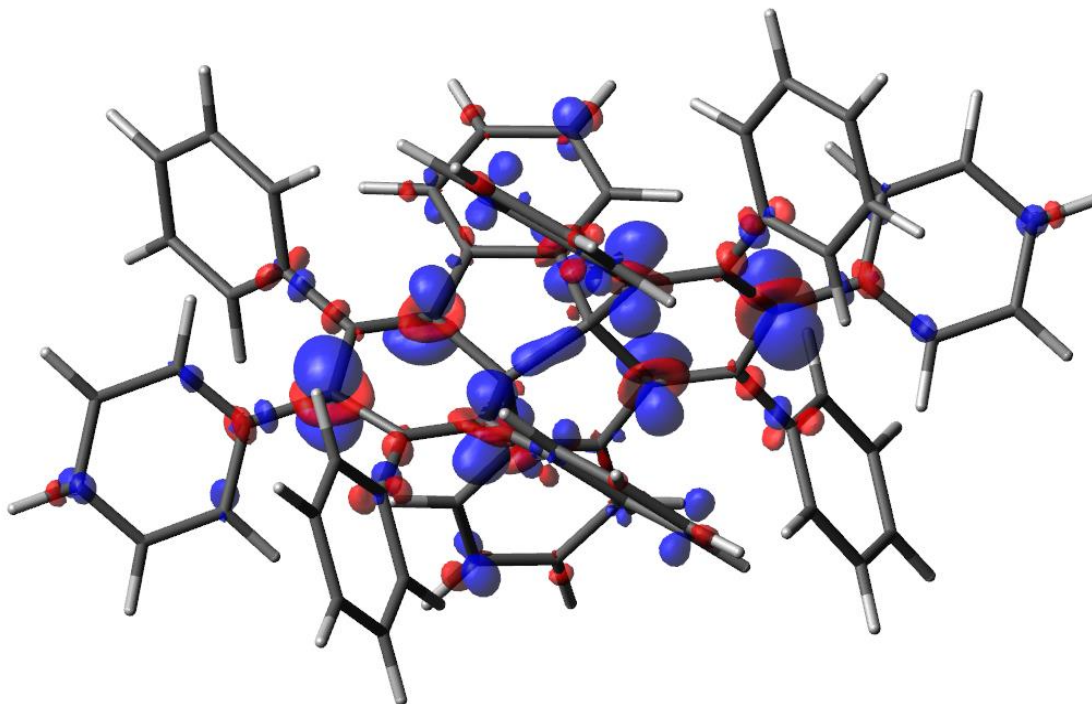

**Fig. S33** Optimized structure and differential charge distribution of  $\mathbf{1}_{\text{TR}}^{2-}$  (with respect to neutral  $\mathbf{1}_{\text{TR}}$  at the same geometry). Blue: Increase of electron density, red: decrease of electron density. Iso-surfaces plotted at  $0.004 \text{ e/Bohr}^{-3}$ .

### Computed Energies:

Computed SCF energies and zero-point vibrational energies (ZPVE) in Hartree on the COSMO-B3LYP/TZVP level of theory (except  $\text{Li}_2$  (gas phase) which was calculated without COSMO).

|        | <b>1</b>        | <b>1<sup>-</sup></b>            | <b>1<sub>TR</sub><sup>-</sup></b>  | <b>1<sup>2-</sup></b>                | <b>1<sub>TR</sub><sup>2-</sup></b>  |
|--------|-----------------|---------------------------------|------------------------------------|--------------------------------------|-------------------------------------|
| E(SCF) | -2771.997107    | -2772.052488                    | -2772.013941                       | -2772.087051                         | -2772.091268                        |
| ZPVE   | 0.966777        | 0.978733                        | 0.978452                           | 0.973850                             | 0.975950                            |
|        | <b>1a</b>       | <b>1a<sup>-</sup></b>           | <b>1a<sub>TR</sub><sup>-</sup></b> | <b>1a<sup>2-</sup></b>               | <b>1a<sub>TR</sub><sup>2-</sup></b> |
| E(SCF) | -923.998514     | -924.046643                     | -923.998322                        | -924.073195                          | -924.078869                         |
| ZPVE   | 0.321915        | 0.316758                        | 0.315401                           | 0.314002                             | 0.313007                            |
|        | [2.2.2]cryptand | $\text{Li}^+$ ([2.2.2]cryptand) | $\text{Li}_2$ (gas ph.)            | <b>[1a<sup>2-</sup>]<sup>‡</sup></b> |                                     |
| E(SCF) | -1268.143167    | -1275.645829                    | -14.997218                         | -924.050752                          |                                     |
| ZPVE   | 0.553779        | 0.559651                        | 0.000755                           | 0.311671                             |                                     |

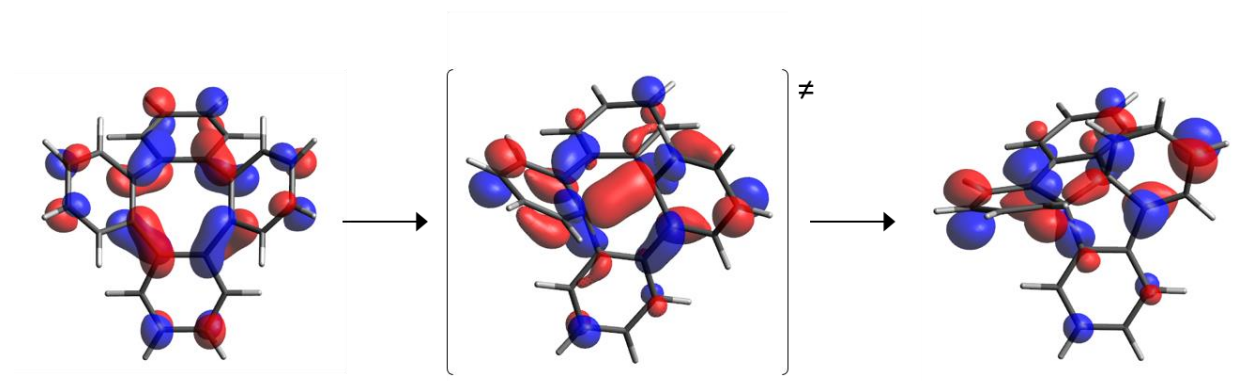

**Fig. S34** HOMO upon transformation of  $\mathbf{1a}^{2-}$  ( $= \mathbf{1}^{2-}$  without phenyl substituents). Iso-surfaces plotted at  $0.04 \text{ Bohr}^{-3/2}$ .

## VII. Comment on Crystallographic Data Quality

**Figs. 35-38** show that the effective resolution of **2** and **3** does not reach the minimum required resolution of 0.84 Å due to weak diffraction of the corresponding single crystals. On the in-house single crystal X-ray diffractometer, the exposure time was set as 60 seconds, but the diffraction was still not strong enough. Longer exposure times were also tried but the background noise has dramatically increased with the prolonged exposure times, which as a result, did not lead to better quality data. It should be noted that the reported data of **2** and **3** are not the only data sets that were ever collected. Before publication, multiple crystals of **2** and **3** have been checked from different reactions, different sample batches, different crystal growth methods, and using different wavelengths for data collection (Mo and Cu radiation for our in-house single crystal X-ray diffraction instrument, and synchrotron X-ray diffraction facilities in Argonne National Laboratory). However, none of them yield stronger diffraction data than the data presented. This could stem from two factors: 1) The unit cells of both **2** and **3** are large (close to 10,000 Å<sup>3</sup>), which typically results in a less orderly packing.<sup>[21-24]</sup> 2) Both **2** and **3** contain severely disordered solvent molecules, which also lead to loose packing and as a result, weak diffraction.<sup>[25]</sup> Due to these limiting factors, it was impossible to obtain stronger data even though very powerful X-ray source and optimal settings were employed for data collections of **2** and **3**.

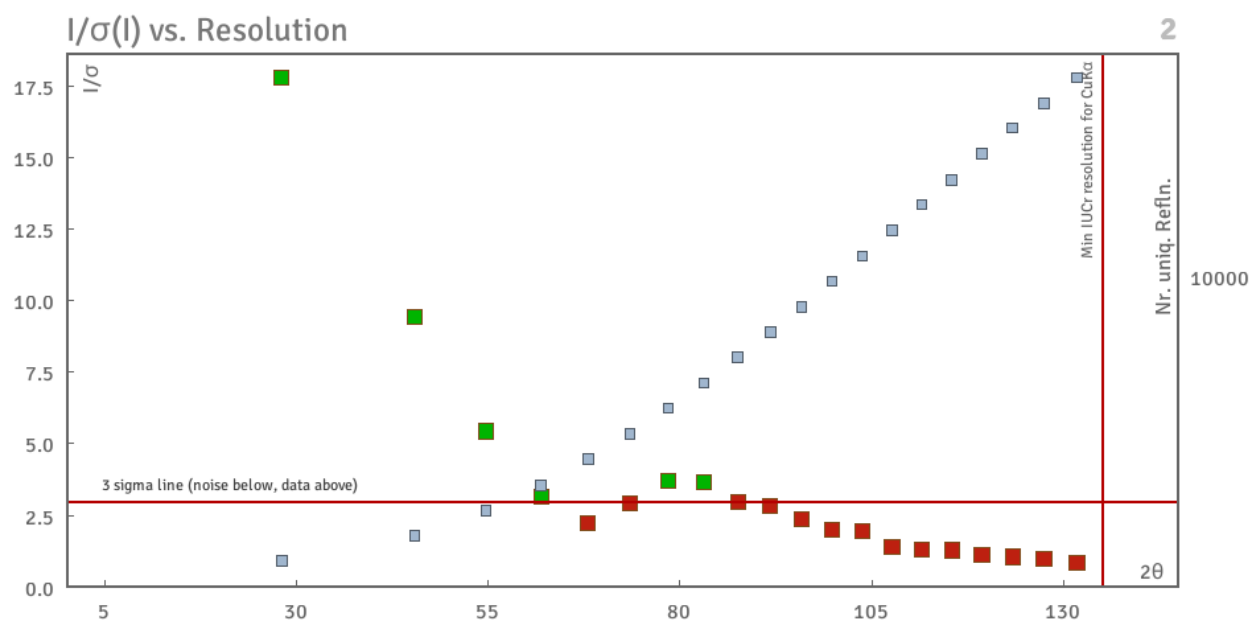

**Fig. S35** Plot of  $I/\sigma(I)$  vs. resolution for crystal data of **2**.



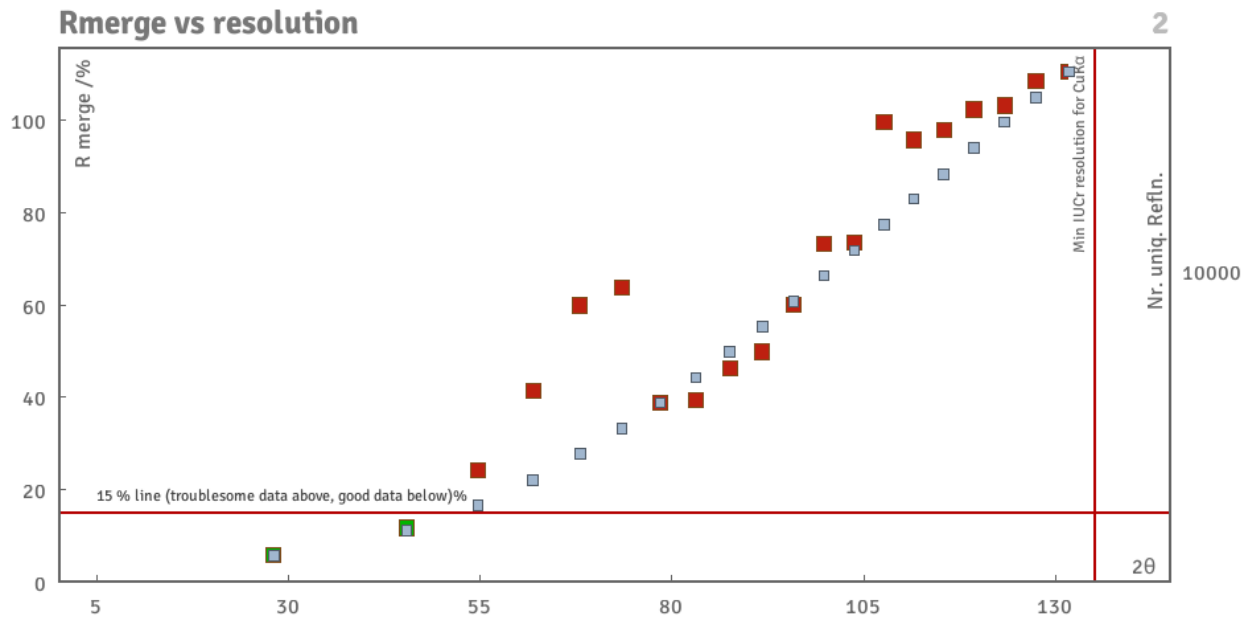

**Fig. S36** Plot of  $R_{\text{merge}}$  vs. resolution for crystal data of 2.

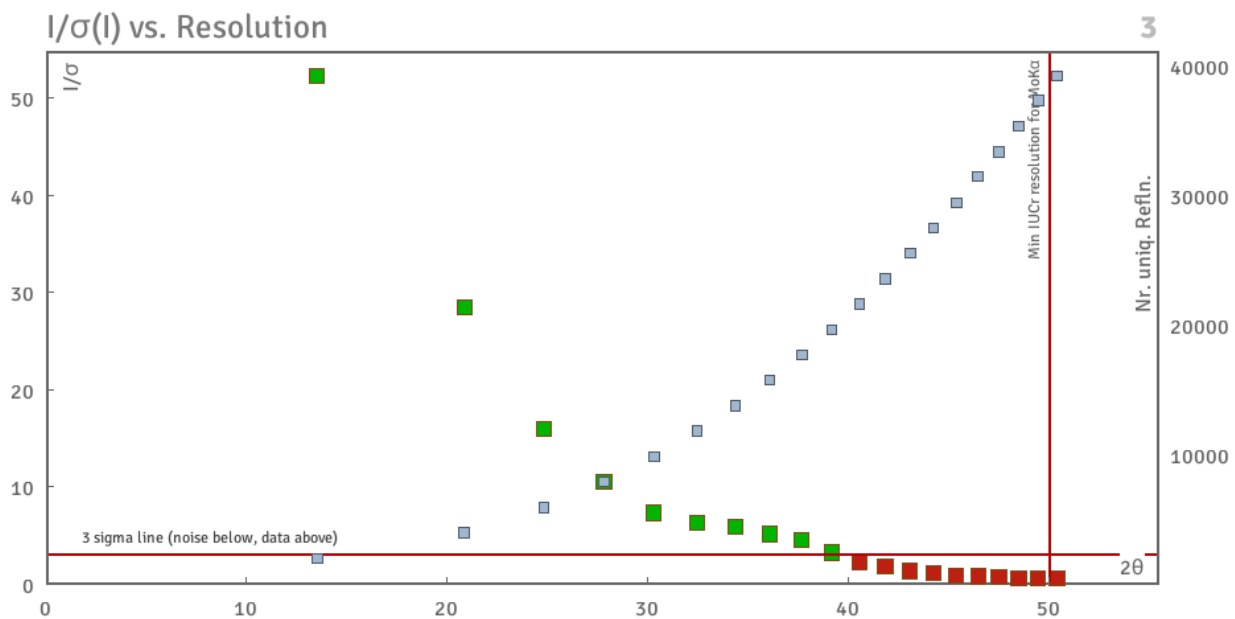

**Fig. S37** Plot of  $I/\sigma(I)$  vs. resolution for crystal data of 3.

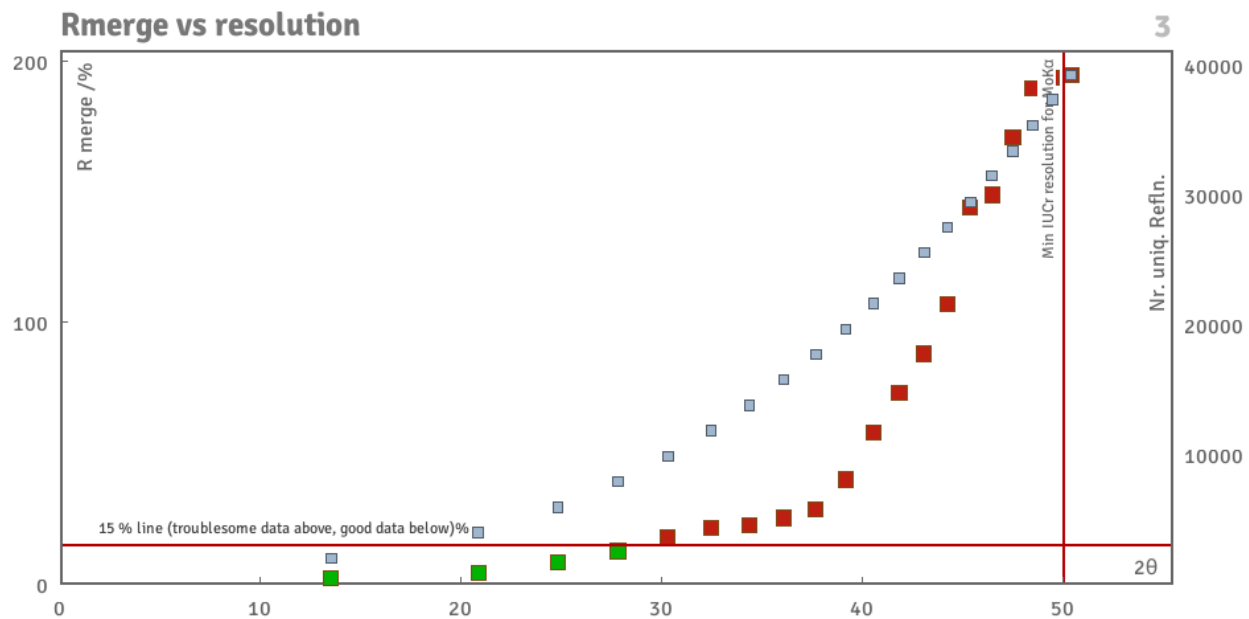

**Fig. S38** Plot of  $R_{\text{merge}}$  vs. resolution for crystal data of **3**.

## VIII. References

- [1] N. V. Kozhemyakina, J. Nuss and M. Jansen, *Z. Anorg. Allg. Chem.*, 2009, **635**, 1355-1361.
- [2] Z. Zhou, Y. Zhu, Z. Wei, J. Bergner, C. Neiß, S. Doloczki, A. Görling, M. Kivala and M. A. Petrukhina, *Angew. Chem. Int. Ed.*, 2020, **60**, 3510-3514.
- [3] SAINT; part of Bruker APEX3 software package (version 2016.9-0): Bruker AXS, 2016.
- [4] SADABS; part of Bruker APEX3 software package (version 2016.9-0): Bruker AXS, 2016.
- [5] G. M. Sheldrick, *Acta Crystallogr.*, 2015, **A71**, 3-8.
- [6] G. M. Sheldrick, *Acta Crystallogr.*, 2015, **C71**, 3-8.
- [7] O. V. Dolomanov, L. J. Bourhis, R. J. Gildea, J. A. K. Howard and H. Puschmann, *J. Appl. Crystallogr.*, 2009, **42**, 339-341.
- [8] A. L. Spek, *Acta Crystallogr. C*, 2015, **71**, 9-18.
- [9] TURBOMOLE V7.3 2018, a development of University of Karlsruhe and Forschungszentrum Karlsruhe GmbH, 1989-2007, TURBOMOLE GmbH, since 2007; available from <http://www.turbomole.com>.
- [10] A. D. Becke, *J. Chem. Phys.*, 1993, **98**, 5648-5652.
- [11] F. Weigend and R. Ahlrichs, *Phys. Chem. Chem. Phys.*, 2005, **7**, 3297-3305.
- [12] K. Eichkorn, O. Treutler, H. Öhm, M. Häser and R. Ahlrichs, *Chem. Phys. Lett.*, 1995, **242**, 652-660.
- [13] M. Sierka, A. Hogekamp and R. Ahlrichs, *J. Chem. Phys.*, 2003, **118**, 9136-9148.
- [14] F. Weigend, *Phys. Chem. Chem. Phys.*, 2006, **8**, 1057-1065.
- [15] S. Grimme, J. Antony, S. Ehrlich and H. Krieg, *J. Chem. Phys.*, 2010, **132**, 154104.
- [16] A. Klamt and G. Schüürmann, *J. Chem. Soc., Perkin Trans., 2* 1993, 799-805.
- [17] A. Klamt, C. Moya and J. Palomar, *J. Chem. Theo. Comp.*, 2015, **11**, 4220-4225.
- [18] A. Klamt and V. Jonas, *J. Chem. Phys.*, 1996, **105**, 9972-9981.
- [19] S. Grimme, *Chem. Eur. J.*, 2012, **18**, 9955-9964.
- [20] *CRC Handbook of Chemistry and Physics* 2017, Section 5: Standard Thermodynamic Properties of Chemical Substances.
- [21] M. Coletta, T. G. Tziotzi, M. Gray, G. S. Nichol, M. K. Singh, C. J. Milios, E. K. Brechin, *Chem. Commun.* 2021, **57**, 4122-4125.

- [22] B. L. Ouay, H. Yoshino, K. Sasaki, Y. Ohtsubo, R. Ohtani, M. Ohba, *Chem. Commun.* 2021, **57**, 5187-5190.
- [23] A. Wong, A. Chakraborty, D. Bawari, G. Wu, R. Dobrovetsky, G. Ménard, *Chem. Commun.* 2021, **57**, 6903-6906.
- [24] M. S. Smyth, J. H. J. Martin, *Mol. Pathol.* 2000, **53**, 8-14.
- [25] B. Heras, J. L. Martin, *Acta Cryst.* 2005, **D61**, 1173-1180.
